# Supplementary material for: Identification of anatomic risk factors for acute coronary events by optical coherence tomography in patients with myocardial infarction and residual nonflow limiting lesions: rationale and design of the PECTUS-obs study
Source: PubMed Central journal article supplement — BMJ Open. 2021 Jul 7;11(7):e048994. doi: 10.1136/bmjopen-2021-048994 (PMC8264896; doi:10.1136/bmjopen-2021-048994), 2021-07-07
Supplement: bmjopen-2021-048994.draft_revisions.pdf [file bmjopen-2021-048994.draft_revisions.pdf]

# BMJ Open

BMJ Open is committed to open peer review. As part of this commitment we make the peer review history of every article we publish publicly available.

When an article is published we post the peer reviewers' comments and the authors' responses online. We also post the versions of the paper that were used during peer review. These are the versions that the peer review comments apply to.

The versions of the paper that follow are the versions that were submitted during the peer review process. They are not the versions of record or the final published versions. They should not be cited or distributed as the published version of this manuscript.

BMJ Open is an open access journal and the full, final, typeset and author-corrected version of record of the manuscript is available on our site with no access controls, subscription charges or pay-per-view fees (<http://bmjopen.bmj.com>).

If you have any questions on BMJ Open's open peer review process please email [info.bmjopen@bmj.com](mailto:info.bmjopen@bmj.com)

# BMJ Open

## Identification of anatomic risk factors for acute coronary events by Optical Coherence Tomography in patients with myocardial infarction and residual non-flow limiting lesions: Rationale and design of the PECTUS-obs study.

|                               |                                                                                                                                                                                                                                                                                                                                                                                                                                                                                                                                                                                                                                                                                                                                                                                                                                                                                                                                                                                                                                                                                                                                                                                                                                                                                                                                                                                                                                          |
|-------------------------------|------------------------------------------------------------------------------------------------------------------------------------------------------------------------------------------------------------------------------------------------------------------------------------------------------------------------------------------------------------------------------------------------------------------------------------------------------------------------------------------------------------------------------------------------------------------------------------------------------------------------------------------------------------------------------------------------------------------------------------------------------------------------------------------------------------------------------------------------------------------------------------------------------------------------------------------------------------------------------------------------------------------------------------------------------------------------------------------------------------------------------------------------------------------------------------------------------------------------------------------------------------------------------------------------------------------------------------------------------------------------------------------------------------------------------------------|
| Journal:                      | <i>BMJ Open</i>                                                                                                                                                                                                                                                                                                                                                                                                                                                                                                                                                                                                                                                                                                                                                                                                                                                                                                                                                                                                                                                                                                                                                                                                                                                                                                                                                                                                                          |
| Manuscript ID                 | bmjopen-2021-048994                                                                                                                                                                                                                                                                                                                                                                                                                                                                                                                                                                                                                                                                                                                                                                                                                                                                                                                                                                                                                                                                                                                                                                                                                                                                                                                                                                                                                      |
| Article Type:                 | Protocol                                                                                                                                                                                                                                                                                                                                                                                                                                                                                                                                                                                                                                                                                                                                                                                                                                                                                                                                                                                                                                                                                                                                                                                                                                                                                                                                                                                                                                 |
| Date Submitted by the Author: | 12-Jan-2021                                                                                                                                                                                                                                                                                                                                                                                                                                                                                                                                                                                                                                                                                                                                                                                                                                                                                                                                                                                                                                                                                                                                                                                                                                                                                                                                                                                                                              |
| Complete List of Authors:     | Mol, Jan-Quinten; Radboudumc, cardiology<br>Belkacemi, Anouar; Isala Hospitals, Department of Cardiology<br>Volleberg, Rick; Radboudumc, Department of Cardiology<br>Meuwissen, Martijn; Amphia Hospital, Department of Cardiology<br>Protopopov, Aleksey; Regional state hospital, Cardiovascular Center<br>Laanmets, Peep; North Estonia Medical Centre, Department of Cardiology<br>Krestyaninov, Oleg; FSBI National Medical Research Center named after E N Meshalkin, Department of Cardiology<br>Dennert, Robert; Dr Horacio E Oduber Hospital, Department of Cardiology<br>Oemrawsingh, Rohit; Albert Schweitzer Hospital, Department of Cardiology<br>van Kuijk, Jan-Peter; Sint Antonius Hospital, Department of Cardiology<br>Arkenbout, Karin; Tergooi Hospitals, Department of Cardiology<br>van der Heijden, Dirk-Jan; Medisch Centrum Haaglanden, Cardiology<br>Rasoul, Saman; Zuyderland Medical Centre Heerlen; Maastricht Universitair Medisch Centrum+, Cardiology<br>Lipsic, Erik; University Medical Centre Groningen, Department of Cardiology<br>Teerenstra, Steven; Radboud University Medical Center, Department for Health Evidence<br>Camaro, Cyril; Radboudumc, Cardiology<br>Damman, P.; Radboudumc, Department of Cardiology<br>van Leeuwen, Maarten; Isala Hospitals, Department of Cardiology<br>van Geuns, Robert-Jan; Radboudumc, Cardiology<br>van Royen, Niels; Radboudumc, Department of Cardiology |
| Keywords:                     | Coronary heart disease < CARDIOLOGY, Coronary intervention < CARDIOLOGY, Myocardial infarction < CARDIOLOGY                                                                                                                                                                                                                                                                                                                                                                                                                                                                                                                                                                                                                                                                                                                                                                                                                                                                                                                                                                                                                                                                                                                                                                                                                                                                                                                              |
|                               |                                                                                                                                                                                                                                                                                                                                                                                                                                                                                                                                                                                                                                                                                                                                                                                                                                                                                                                                                                                                                                                                                                                                                                                                                                                                                                                                                                                                                                          |

SCHOLARONE™  
Manuscripts

1  
2  
3  
4  
5  
6  
7  
8  
9  
10  
11  
12  
13  
14  
15  
16  
17  
18  
19  
20  
21  
22  
23  
24  
25  
26  
27  
28  
29  
30  
31  
32  
33  
34  
35  
36  
37  
38  
39  
40  
41  
42  
43  
44  
45  
46  
47  
48  
49  
50  
51  
52  
53  
54  
55  
56  
57  
58  
59  
60

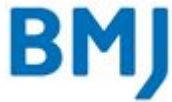

I, the Submitting Author has the right to grant and does grant on behalf of all authors of the Work (as defined in the below author licence), an exclusive licence and/or a non-exclusive licence for contributions from authors who are: i) UK Crown employees; ii) where BMJ has agreed a CC-BY licence shall apply, and/or iii) in accordance with the terms applicable for US Federal Government officers or employees acting as part of their official duties; on a worldwide, perpetual, irrevocable, royalty-free basis to BMJ Publishing Group Ltd ("BMJ") its licensees and where the relevant Journal is co-owned by BMJ to the co-owners of the Journal, to publish the Work in this journal and any other BMJ products and to exploit all rights, as set out in our [licence](#).

The Submitting Author accepts and understands that any supply made under these terms is made by BMJ to the Submitting Author unless you are acting as an employee on behalf of your employer or a postgraduate student of an affiliated institution which is paying any applicable article publishing charge ("APC") for Open Access articles. Where the Submitting Author wishes to make the Work available on an Open Access basis (and intends to pay the relevant APC), the terms of reuse of such Open Access shall be governed by a Creative Commons licence – details of these licences and which [Creative Commons](#) licence will apply to this Work are set out in our licence referred to above.

Other than as permitted in any relevant BMJ Author's Self Archiving Policies, I confirm this Work has not been accepted for publication elsewhere, is not being considered for publication elsewhere and does not duplicate material already published. I confirm all authors consent to publication of this Work and authorise the granting of this licence.

1  
2  
3  
4 1 **Identification of anatomic risk factors for acute coronary events by**  
5 2 **Optical Coherence Tomography in patients with myocardial**  
6 3 **infarction and residual non-flow limiting lesions: Rationale and**  
7 4 **design of the PECTUS-obs study.**  
8  
9  
10  
11  
12  
13

14 6 *Authors*

15  
16 7 J.H.Q. Mol<sup>1</sup>, MD, A. Belkacemi<sup>2</sup>, MD, PhD, R.H.J.A. Volleberg<sup>1</sup>, MD, M. Meuwissen<sup>3</sup>, MD, PhD, A.V.  
17 8 Protopopov<sup>4</sup>, MD, PhD, P. Laanmets<sup>5</sup>, MD, O.V. Krestyaninov<sup>6</sup>, MD, PhD, R. Dennert<sup>7</sup>, MD, PhD, R.M.  
18 9 Oemrawsingh<sup>8</sup>, MD, PhD, J.P. van Kuijk<sup>9</sup>, MD, PhD, E.K. Arkenbout<sup>10</sup>, MD, PhD, D.J. van der Heijden<sup>11</sup>,  
19 10 MD, PhD, S. Rasoul<sup>12</sup>, MD, PhD, E. Lipsic<sup>13</sup>, MD, PhD, S. Teerenstra<sup>14</sup>, MSc, PhD, C. Camaro<sup>1</sup>, MD, P.  
20 11 Damman<sup>1</sup>, MD, PhD, M.A.H. van Leeuwen<sup>2</sup>, MD, PhD, R.J. van Geuns<sup>1</sup>, MD, PhD, N. Van Royen<sup>1</sup>, MD,  
21 12 PhD  
22  
23  
24

25 13 *Institutions*

26  
27  
28 14 <sup>1</sup> Department of Cardiology, Radboud University Medical Center, Nijmegen, the Netherlands.

29  
30 15 <sup>2</sup> Department of Cardiology, Isala Hospitals, Zwolle, the Netherlands.

31  
32 16 <sup>3</sup> Department of Cardiology, Amphia Hospital, Breda, the Netherlands.

33  
34 17 <sup>4</sup> Cardiovascular Center of Regional State Hospital, Krasnoyarsk, Russia.

35  
36 18 <sup>5</sup> Cardiology Center, North Estonia Medical Center, Tallinn, Estonia.

37  
38 19 <sup>6</sup> Meshalkin National Medical Research Center, Novosibirsk, Russia.

39  
40 20 <sup>7</sup> Department of Cardiology, Dr. Horacio E. Oduber Hospital, Aruba.

41  
42 21 <sup>8</sup> Department of Cardiology, Albert Schweitzer Hospital, Dordrecht, the Netherlands.

43  
44 22 <sup>9</sup> Department of Cardiology, Sint Antonius Hospital, Nieuwegein, the Netherlands.

45  
46 23 <sup>10</sup> Department of Cardiology, Tergooi Hospital, Blaricum, the Netherlands.

47  
48 24 <sup>11</sup> Department of Cardiology, Haaglanden Medical Center, The Hague, the Netherlands.

49  
50 25 <sup>12</sup> Department of Cardiology, Zuyderland Medical Center, Heerlen, the Netherlands.

51  
52 26 <sup>13</sup> Department of Cardiology, University Medical Center Groningen, Groningen, the Netherlands.

53  
54  
55 27 <sup>14</sup> Department of Epidemiology, Biostatistics and Health Technology Assessment, Radboud University  
56 28 Medical Center, Nijmegen, The Netherlands.  
57  
58  
59  
60

1  
2  
3  
4  
5  
6  
7  
8  
9  
10  
11  
12  
13  
14  
15  
16  
17  
18  
19  
20  
21  
22  
23  
24  
25  
26  
27  
28  
29  
30  
31  
32  
33  
34  
35  
36  
37  
38  
39  
40  
41  
42  
43  
44  
45  
46  
47  
48  
49  
50  
51  
52  
53  
54  
55  
56  
57  
58  
59  
60

29

30

31 *Word count*

32 2650

33

34 *Keywords*

35 Myocardial Infarction (MI), Non-culprit Lesion, Fractional Flow Reserve (FFR), Optical Coherence

36 Tomography (OCT), Vulnerable Plaque

37

38 *Address for correspondence*

39 Prof. Niels van Royen, MD, PhD

40 Radboud University Medical Center

41 PO Box 9101, 6500 HB, Nijmegen

42 The Netherlands

43 Niels.vanRoyen@radboudumc.nl

44

45

## 46 **Abstract**

### 47 **Introduction**

48 In patients with myocardial infarction, the decision to treat a non-culprit lesion is generally based on  
49 its physiological significance. However, deferral of revascularization based on non-ischemic fractional  
50 flow reserve (FFR) values in these patients results in less favorable outcomes compared to patients  
51 with stable coronary artery disease (CAD), potentially caused by vulnerable non-culprit lesions.  
52 Intravascular optical coherence tomography (OCT) imaging allows for in vivo morphological  
53 assessment of plaque 'vulnerability', and might aid in the detection of FFR-negative lesions at high  
54 risk for recurrent events.

### 55 **Methods and analysis**

56 The PECTUS-obs study is an international multicenter prospective observational study that aims to  
57 relate OCT-derived vulnerable plaque characteristics of non-flow limiting, non-culprit lesions to  
58 clinical outcome in patients with myocardial infarction. A total of 438 patients presenting with  
59 myocardial infarction (STEMI and NSTEMI) will undergo OCT-imaging of any FFR-negative non-culprit  
60 lesion for detection of plaque vulnerability. The primary study endpoint is a composite of Major  
61 Adverse Cardiovascular Events (all-cause mortality, non-fatal myocardial infarction, or unplanned  
62 revascularization) at 2-year follow-up. Secondary endpoints will be the same composite at 1- and 5-  
63 year follow-up, target vessel failure, target vessel revascularization, target lesion failure and target  
64 lesion revascularization.

### 65 **Ethics and dissemination**

66 This study has been approved by the Medical Ethics Committee of the region Arnhem-Nijmegen. The  
67 results of this study will be disseminated in a main paper and additional papers with subgroup  
68 analyses.

1  
2  
3 69 **Registered under NCT03857971 on 28-02-2019**  
4  
5

6 70  
7

8  
9 **Strengths and limitations of this study**

- 10  
11 72 • The PECTUS-obs is the first prospective study to assess the incremental value of OCT imaging  
12  
13 73 of FFR-deferred non-culprit lesions in patients presenting with MI.  
14  
15 74 • OCT is the only imaging modality with a spatial resolution high enough to truly measure  
16  
17 75 fibrous cap thickness, the plaque feature most associated with adverse events.  
18  
19 76 • In PECTUS-obs, OCT imaging will only be performed at baseline. However, any new MI or  
20  
21 77 revascularization will be allocated to a specific coronary vessel and lesion by comparison of  
22  
23 78 the baseline and follow-up angiograms.  
24  
25 79 • If intracoronary imaging with OCT is able to identify lesions associated with worse outcome,  
26  
27 80 this might warrant studies on focal or pharmacological intervention of OCT-determined  
28  
29 81 vulnerable plaques.  
30  
31  
32  
33  
34  
35  
36  
37  
38  
39 84  
40  
41  
42  
43  
44  
45  
46  
47  
48  
49  
50  
51  
52  
53  
54  
55  
56  
57  
58  
59  
60



## 85 Introduction

86 In patients presenting with myocardial infarction (MI), percutaneous coronary intervention (PCI) of  
87 the culprit lesion is the standard method of treatment. [1] A high percentage of these patients have  
88 additional lesions at different sites in the coronary arteries, not responsible for the acute event. The  
89 optimal treatment of these non-culprit lesions is subject of extensive research, because their  
90 presence confers a greater risk of future major adverse cardiac events (MACE) [2, 3]. Recent studies  
91 showed that complete revascularization results in improved outcomes compared to treatment of the  
92 culprit lesion only. [4-6] However, non-selective revascularization of all non-culprit lesions may lead  
93 to overtreatment.

94 The selection of non-culprit lesions qualifying for revascularization is often based on whether a  
95 lesions causes ischemia, as determined by invasive measurements such as the fractional flow reserve  
96 (FFR). [7] In patients with stable coronary artery disease (CAD), FFR-guided complete  
97 revascularization results in better outcomes compared to angiography guided complete  
98 revascularization. [8] Nevertheless, the MACE rates at longer term follow-up remains significant in  
99 the presence of non-significant CAD. [9] In patients presenting with MI this recurrence rate of  
100 ischemic events is even higher. [10] A recent study demonstrated a MACE rate of 23% in acute  
101 coronary syndrome (ACS) patients vs. 11% in patients with stable CAD at 3.4-years follow-up, after  
102 FFR based deferral of revascularization. Among these ACS patients, especially those presenting with  
103 NSTEMI had a high event rate (42%). [11]

104 Apart from coronary physiology, the structural components of non-culprit lesions might provide  
105 other markers for future adverse events. Autopsy studies have granted insight into the lesion  
106 characteristics that are associated with plaque rupture, and subsequent MI or sudden death. These  
107 lesions tend to contain a large lipid pool with a thin overlying fibrous cap, and display a large degree  
108 of outward remodeling. [12, 13] These 'thin-cap fibroatheromas' (TCFA) are more frequently  
109 observed in both culprit- and non-culprit lesions of patients presenting with MI than in patients

1  
2  
3 110 presenting with stable CAD. [14-16] Therefore, screening for vulnerable plaques on top of  
4  
5 111 physiological measurements, should be evaluated for non-culprit lesions.  
6  
7  
8 112 Analysis of lesion composition can be performed in vivo with the use of intravascular imaging  
9  
10 113 techniques such as intravascular ultrasound (IVUS), near infrared spectroscopy (NIRS) and optical  
11  
12 114 coherence tomography (OCT). [17] Prospective studies using IVUS and NIRS showed that  
13  
14 115 identification of lesions at higher risk for future events is feasible. [18, 19] However, OCT might prove  
15  
16 116 more suitable for this purpose, due to its specific characteristics. OCT has a 10-20 times higher spatial  
17  
18 117 resolution than IVUS, allowing for better detection of TCFA. Moreover, a complete acquisition of a  
19  
20 118 coronary segment can be provided within a couple of seconds, with a single pullback. Last,  
21  
22 119 (semi)automated analysis of images is more feasible due to the high resolution of the acquired  
23  
24 120 images. [20] Nevertheless, OCT has yet to be prospectively validated for its ability to identify lesions  
25  
26 121 at risk for future MACE in MI patients.  
27  
28  
29  
30  
31 122 For future studies on potential preventive revascularization or more aggressive pharmacological  
32  
33 123 therapy in patients with high risk lesions, prospective studies with clinical outcomes are imperative.  
34  
35 124 In the PECTUS-obs study, we aim to relate OCT-derived plaque characteristics of not significantly flow  
36  
37 125 limiting, non-culprit lesions to clinical outcome in patients presenting with MI.  
38  
39  
40

41  
42 126  
43  
44  
45  
46  
47  
48  
49  
50  
51  
52  
53  
54  
55  
56  
57  
58  
59  
60

## 127 **Methods and analysis**

### 128 *Overview*

129 The PECTUS-obs study is designed as an international multicenter prospective observational study.  
 130 Eligible patients have to undergo an index CAG during hospitalization for an acute myocardial  
 131 infarction, which reveals one or more non-culprit lesions accessible for imaging with OCT. FFR-  
 132 measurements of these non-culprit lesions are made during the same index procedure, or during a  
 133 staged procedure. Any FFR-nonsignificant lesions are subsequently imaged with OCT. Additional  
 134 criteria are listed in table 1. A total of 438 patients will be included. A flow-chart of the study design  
 135 is depicted in figure 1.

**Table 1. Inclusion- and exclusion criteria**

| Inclusion criteria                                                                                                                                                                                                                                                                                                                                                                                                                                                                                                                                                                                                                                                                                                                 | Exclusion criteria                                                                                                                                                                                                                                                                                                                                                                                                                                                                                                                                                                                                                                                                                                         |
|------------------------------------------------------------------------------------------------------------------------------------------------------------------------------------------------------------------------------------------------------------------------------------------------------------------------------------------------------------------------------------------------------------------------------------------------------------------------------------------------------------------------------------------------------------------------------------------------------------------------------------------------------------------------------------------------------------------------------------|----------------------------------------------------------------------------------------------------------------------------------------------------------------------------------------------------------------------------------------------------------------------------------------------------------------------------------------------------------------------------------------------------------------------------------------------------------------------------------------------------------------------------------------------------------------------------------------------------------------------------------------------------------------------------------------------------------------------------|
| <p style="text-align: center;"><b>Clinical</b></p> <ul style="list-style-type: none"> <li>- Age <math>\geq</math> 18 years</li> <li>- Hospitalization with a STEMI or NSTEMI for which patient is subjected to invasive coronary angiography (within the last 6 weeks).</li> </ul> <p style="text-align: center;"><b>Angiographical</b></p> <ul style="list-style-type: none"> <li>- Patient has <math>\geq</math> 1 non-culprit, target lesion(s) with following additional characteristics:               <ul style="list-style-type: none"> <li>o Lesion has visual stenosis of 30-90%.</li> <li>o Lesion is non-obstructive (FFR <math>&gt;</math> 0.80).</li> <li>o Lesion is not in-stent restenosis.</li> </ul> </li> </ul> | <p style="text-align: center;"><b>Clinical</b></p> <ul style="list-style-type: none"> <li>- Pregnancy.</li> <li>- Hemodynamic instability, respiratory failure, or Killip class <math>\geq</math> 3 at time of inclusion.</li> <li>- Previous CABG.</li> <li>- Indication for revascularization by CABG.</li> <li>- Estimated life expectancy <math>&lt;</math> 3 year.</li> </ul> <p style="text-align: center;"><b>Angiographical</b></p> <ul style="list-style-type: none"> <li>- Anatomy of target lesion(s) is unsuitable for OCT catheter crossing or imaging (aorta-ostial lesions, too small diameter segment, severe calcifications, chronic total occlusion, distal lesions prohibiting OCT imaging).</li> </ul> |
| <p><b>Table 1. Inclusion- and exclusion criteria</b><br/>           CABG, coronary artery bypass grafting, FFR, fractional flow reserve, NSTEMI, Non- ST-elevation myocardial infarction, OCT, optical coherence tomography, STEMI, ST-elevation myocardial infarction</p>                                                                                                                                                                                                                                                                                                                                                                                                                                                         |                                                                                                                                                                                                                                                                                                                                                                                                                                                                                                                                                                                                                                                                                                                            |

136

1  
2  
3 137 *Patients and enrolment*  
4  
5

6 138 Patients presenting with MI (ST-elevation and non ST-elevation) are screened for potential inclusion  
7  
8 139 in the study. Patients are treated according to the current guidelines for the management of ACS,  
9  
10 140 including referral for CAG and (potential) PCI of the culprit artery. In case of one or more non-culprit  
11  
12 141 lesions of intermediate stenosis (30-90%), clinically indicated FFR measurements are performed in  
13  
14 142 order to determine if these non-culprit stenoses are hemodynamically significant (figure 2). If a  
15  
16 143 stenosis is non-significant (FFR > 0.8) and the patient is eligible for inclusion based on the criteria  
17  
18 144 listed in table 1, informed consent is obtained for participation in the study. If the FFR is  $\leq 0.80$   
19  
20 145 (hemodynamically significant), the patient is revascularized according to the current therapeutic  
21  
22 146 guidelines.  
23  
24  
25  
26

27 147 *Timing of FFR measurements and informed consent*  
28  
29

30 148 FFR measurements of non-culprit lesions are performed either during the index CAG, or during a  
31  
32 149 staged procedure within 6 weeks. If non-culprit lesions are assessed during the index procedure,  
33  
34 150 patients are approached for participation after revascularization of the culprit artery and any FFR  
35  
36 151 measurements. After oral consent, the OCT pullbacks are performed of all FFR-negative stenosis.  
37  
38 152 Written informed consent is acquired after the procedure. If non-culprit lesion will be evaluated  
39  
40 153 during a staged procedure, written informed consent is acquired prior to the staged procedure.  
41  
42  
43

44 154 *OCT-imaging*  
45  
46

47 155 After administration of intracoronary nitrates an OCT pullback of the target lesion is acquired using  
48  
49 156 the FD-OCT ILUMIEN system (Abbott, USA) over a normal 0.14" guidewire or pressure wire. The OCT  
50  
51 157 system is CE marked and deployed as intended by the manufacturer. For effective clearing of blood  
52  
53 158 from the imaging field angiographic contrast media is injected. For the average coronary vessel 14 ml  
54  
55 159 of contrast media is injected using an automated injector at a rate of 4 mL/s at 300 PSI. The contrast  
56  
57 160 amount and/or infusion rate can be adjusted proportionally to coronary artery diameter to ensure  
58  
59  
60

1  
2  
3 161 good image quality. The segment of interest is scanned with a pull-back speed of 18 mm/sec (54mm  
4  
5 162 segment). The entire OCT-pullback is recorded simultaneously with fluoroscopy to ensure that the  
6  
7 163 anatomy of the OCT pullback can be linked to the angiogram. Multiple runs are allowed in case of  
8  
9  
10 164 poor image quality. In case of multiple target lesions eligible for OCT imaging, OCT imaging of each  
11  
12 165 target lesion is performed. OCT images are not used for procedural guidance.  
13  
14

#### 15 166 *Blood sampling*

16  
17  
18 167 During CAG, after OCT imaging is performed, 10ml of blood is drawn from the arterial sheath. This  
19  
20 168 blood is used for determination of biomarkers for plaque- or patient vulnerability.  
21  
22

#### 23 169 *OCT-imaging analysis*

24  
25  
26 170 OCT-images and corresponding angiograms are analyzed off-line by trained personnel in an OCT  
27  
28 171 core-laboratory. Evaluation of the images is based on tissue characteristics as previously described in  
29  
30 172 OCT expert consensus papers. [21, 22] A plaque is deemed 'vulnerable' if it contains two of the  
31  
32 173 following characteristics: a lipid arc of  $\geq 90^\circ$ , a cap thickness of  $< 65 \mu\text{m}$  and either cap rupture or  
33  
34 174 thrombus formation. An example of a vulnerable plaque with a lipid arc of  $>90^\circ$  and a cap thickness  $<$   
35  
36 175  $65 \mu\text{m}$  is shown in figure 2.  
37  
38  
39

#### 40 176 *Study end points*

41  
42  
43  
44 177 The primary study endpoint consists of a composite of major adverse cardiovascular events (all-cause  
45  
46 178 mortality, non-fatal MI (STEMI or NSTEMI), or unplanned revascularization) at 2-year follow-up in  
47  
48 179 patients with a vulnerable plaque as compared to patients without a vulnerable plaque. Secondary  
49  
50 180 endpoints are: MACE at 1- and 5-year follow-up, target vessel failure, target vessel revascularization,  
51  
52 181 target lesion failure and target lesion revascularization.  
53  
54

#### 55 182 *Exploratory analyses*

1  
2  
3 183 Additional exploratory analyses will be performed by comparing non-culprit plaque characteristics in  
4  
5 184 patients presenting with STEMI vs. NSTEMI, in diabetic vs non-diabetic patients, and in male vs.  
6  
7 185 female patients. Plaque morphology will also be related to angiographic lesion features. Moreover, in  
8  
9  
10 186 order to accelerate the process of OCT-imaging interpretation, automated detection of  
11  
12 187 morphological features associated with MACE, will be developed with the use of machine learning.  
13  
14

#### 15 188 *Follow-up and endpoint adjudication*

16  
17  
18 189 At 1-, 2- and 5-years patients are followed-up by telephone contact. Medical records (including  
19  
20 190 coronary angiograms) from participating centers, general practitioners, and other medical centers  
21  
22 191 are used for the verification of endpoints. Additionally, mortality data is obtained from national  
23  
24 192 registries. A clinical event adjudication committee blinded to OCT-data will assess endpoints and  
25  
26 193 allocate any new MI or revascularization to a specific coronary vessel and lesion by comparison of the  
27  
28 194 baseline and follow-up angiograms.  
29  
30

#### 31 195 *Sample size calculation and statistical analysis*

32  
33  
34  
35 196 Total sample size is calculated at 438 patients. Sample size is calculated to provide at least 80%  
36  
37 197 power with a one sided alpha of 0.025 to identify OCT variables associated with non-culprit lesion  
38  
39 198 related major adverse cardiovascular events. It is based on the assumption that high risk OCT defined  
40  
41 199 vulnerable plaques are identified in 60% of targeted lesions, on a total event rate of 25% after two  
42  
43 200 years in FFR deferred lesions in patients with MI [11], and an expected hazard ratio of at least 3.5 for  
44  
45 201 OCT defined vulnerable plaques. [18] The power of 80% is maintained when the hazard ratio is lower  
46  
47 202 than expected but at least 2.0, or when the event rate is lower than expected but at least 10%.  
48  
49 203 Estimated loss to follow up is 5%, and inadequate OCT scans prohibiting assessment of vulnerable  
50  
51 204 plaque characteristics are expected in 5% of cases.  
52  
53  
54

55  
56 205 At 2-year follow-up, MACE in patients with vulnerable plaque characteristics will be compared to  
57  
58 206 patients without vulnerable plaque characteristics in terms of the hazard ratio. Descriptives will be  
59  
60

1  
2  
3 207 expressed as mean  $\pm$  SD (continuous data) or as frequencies and proportions (categorical data).  
4  
5 208 Continuous variables are presented as mean SD if normally distributed, or median [interquartile  
6  
7 209 range] if not normally distributed. Categorical variables are presented as counts and percentages.  
8  
9  
10 210 Continuous variables are compared between groups using the Student t test or its nonparametric  
11  
12 211 equivalent Mann-Whitney U test. The chi-square test (for comparison of proportions) will be  
13  
14 212 performed where appropriate. Multivariate Cox proportional hazard regression will be used to  
15  
16 213 correct for differences in baseline characteristics like age, sex, diabetes mellitus, hypertension,  
17  
18 214 dyslipidemia, indication for CAG (STEMI vs NSTEMI), history of MI and history of PCI if necessary. All  
19  
20  
21 215 calculations will be generated by statistical package for social sciences software (SPSS Statistics  
22  
23 216 version 24; IBM Corp., Armonk, NY, USA).

#### 26 217 *Patient and public involvement*

29 218 Patients were not involved in the design of this study.

#### 32 219 **Current status**

36 220 Recruitment commenced in December 2018 and was completed in September 2020. With 2 year  
37  
38 221 follow-up for the primary endpoint, reporting on the study is expected in the beginning of 2023.

42 222

## 223 Discussion

224 The PECTUS-obs study was designed to investigate the association between OCT-determined  
225 characteristics of plaque vulnerability and future major adverse cardiac events in non-flow limiting,  
226 non-culprit lesions of patients presenting with MI.

227 In current practice, the decision whether or not to preventively treat a non-culprit lesion is primarily  
228 based on its physiological significance. Although this strategy is clearly superior in stable CAD, it has  
229 yet to be proven in patients presenting with MI. [8] In STEMI, several large randomized trials have  
230 shown that FFR-guided complete revascularization results in fewer MACE compared to culprit-only  
231 revascularization. [23, 24] However, randomized controlled trials directly comparing FFR-guided  
232 complete revascularization with angiography-guided complete revascularization in STEMI have not  
233 yet been conducted, and the only two studies showing a reduction in major clinical endpoints (death  
234 and MI) after non-culprit revascularization were actually guided by angiography rather than  
235 physiology. [4, 25] For patients with NSTEMI, the evidence is even more scarce. In the only available  
236 randomized trial, the FAMOUS-NSTEMI trial, MACE rates at 1-year follow-up did not differ between  
237 patients with FFR-guided and angiography guided treatment (8.0% vs 8.6%). [26] However, this study  
238 was primarily designed to evaluate the effect of FFR-measurements on management decisions, and  
239 was not powered to assess between-group differences in clinical outcomes. The ongoing SLIM trial  
240 (NCT03562572) aims to address this gap in knowledge. Nevertheless, even if FFR-guided complete  
241 revascularization proves superior in patients with MI, the long term MACE rate remains significant.  
242 [11] It therefore remains unclear if non-culprit lesion selection based solely on FFR is sufficient, or if  
243 other features like plaque morphology need to be taken into account.

244 In previous prospective intravascular imaging studies, plaque morphology has consistently been  
245 analyzed using IVUS. In the PROSPECT study, 697 ACS patients were subjected to three-vessel  
246 radiofrequency (RF)-IVUS imaging. [18] All atherosclerotic lesions found in the recordings were  
247 subsequently analyzed for plaque composition. After a median follow-up of 3.4 years, researchers



1  
2  
3 248 found that non-culprit lesions with a minimal lumen area (MLA) of 4.0 mm<sup>2</sup> or less, a plaque burden  
4  
5 249 of 70% or greater, and those classified as TCFA were associated with a higher rate of MACE.  
6  
7 250 Following PROSPECT, several other studies confirmed the association between RF-IVUS-derived  
8  
9 251 vulnerable plaques and MACE. [27, 28] The main limitation of RF-IVUS when it comes to identifying  
10  
11 252 TCFA is its poor resolution. In the landmark study by Burke et al., 95% of ruptured plaques had a  
12  
13 253 fibrous cap thickness of less than 65µm. [29] More recent reports found that cap thickness of lesions  
14  
15 254 classified as TCFA ranges from 54-84µm. [30] RF-IVUS has a spatial resolution of approximately 150  
16  
17 255 µm, leaving it below the detection range for cap thickness in these lesions. Moreover, of all plaque  
18  
19 256 features that are related with adverse outcomes, cap thickness seems to be the most important. [30]  
20  
21 257 As mentioned earlier, with a spatial resolution of approximately 10µm, we expect that OCT is more  
22  
23 258 suitable for identifying TCFA. However, prospective data on the association between OCT-derived  
24  
25 259 vulnerable plaques and future events are limited. Recently, the arsenal of invasive imaging modalities  
26  
27 260 was broadened by NIRS. The ATHEROREMO-NIRS study proved that NIRS-derived lipid core burden  
28  
29 261 index (LCBI) was associated with MACE at a patient level, whereas the LRP study later expanded on  
30  
31 262 this observation by showing that NIRS can also identify plaques vulnerable to future MACE. [19, 31]  
32  
33 263 The CLIMA study investigated the association between a predefined combination of four high risk  
34  
35 264 plaque features (MLA <3.5 mm<sup>2</sup>, fibrous cap thickness <75µm, a lipid arc >180°, and the presence of  
36  
37 265 macrophage clusters) and clinical events in patients that underwent OCT imaging of the proximal  
38  
39 266 LAD. [32] This combination of features proved to be an independent predictor of events with a  
40  
41 267 hazard ratio of 7.54. However, this study differed from the current design in several aspects. Even  
42  
43 268 though CLIMA involved prospective follow-up, patients were only included after undergoing OCT-  
44  
45 269 imaging for a clinical indication. Moreover, imaging had to be performed on a predefined segment  
46  
47 270 (proximal-mid LAD) that could not include, or be adjacent to, a stenosis of ≥ 50%. Therefore OCT-  
48  
49 271 imaging in this study was used to screen a fixed vessel segment that was relatively free of stenosis,  
50  
51 272 whereas the PECTUS-obs evaluates targeted OCT-imaging of angiographically determined stenoses of  
52  
53 273 intermediate severity that are FFR-negative.  
54  
55  
56  
57  
58  
59  
60

1  
2  
3 274 The COMBINE study shares more similarities with the current study design. [33] In this prospective  
4  
5 275 registry of patients with diabetes requiring invasive angiography, OCT imaging of FFR non-flow  
6  
7 276 limiting lesions revealed that patients with TCFAs had increased target lesion related MACE  
8  
9  
10 277 compared to patients without TCFAs (13.3% vs. 9.7%) at 18 month follow-up. [34] In this study  
11  
12 278 however, only 25% of included patients had presented with an ACS at baseline.  
13  
14  
15 279

16  
17  
18  
19  
20  
21  
22  
23  
24  
25  
26  
27  
28  
29  
30  
31  
32  
33  
34  
35  
36  
37  
38  
39  
40  
41  
42  
43  
44  
45  
46  
47  
48  
49  
50  
51  
52  
53  
54  
55  
56  
57  
58  
59  
60

For peer review only

## 280 **Conclusion**

281 The PECTUS-obs is the first prospective study to assess the incremental value of OCT imaging of FFR-  
282 deferred non-culprit lesions in patients presenting with MI. If intracoronary imaging with OCT is able  
283 to identify lesions associated with worse outcome, this might warrant studies on focal or  
284 pharmacological intervention of OCT-determined vulnerable plaques.

## 285 **Ethics and dissemination**

286 This study has been approved by the Medical Ethics Committee of the region Arnhem-Nijmegen (file  
287 number 2018-4763). All participants gave informed consent prior to inclusion in the study. The  
288 results of this study will be disseminated in a main paper and additional papers with subgroup  
289 analyses.

## 290 **Author contributions**

291 NvR conceived the idea. NvR and JHQM designed the study protocol. ST designed the statistical  
292 analyses. JHQM and NvR drafted the manuscript. AB, RHJAV, MM, AVP, PL, OVK, RD, RMO, JpVK, EKA,  
293 DJvdH, SR, EL, CC, PD, MAHVl and RJvG provided critical revisions and substantial intellectual input.  
294 All authors agreed with the final version of the manuscript.

## 295 **Competing interests**

296 None declared.

## 297 **Funding**

298 This study was financially supported by Abbott Vascular, and Health Holland.

299

300

301 *References*

- 302 1. Neumann, F.J., et al., *2018 ESC/EACTS Guidelines on myocardial revascularization*. Eur Heart J, 2019. **40**(2): p. 87-165.
- 303 2. Glaser, R., et al., *Clinical progression of incidental, asymptomatic lesions discovered during culprit vessel coronary intervention*. Circulation, 2005. **111**(2): p. 143-9.
- 304 3. Goldstein, J.A., et al., *Multiple complex coronary plaques in patients with acute myocardial infarction*. N Engl J Med, 2000. **343**(13): p. 915-22.
- 305 4. Mehta, S.R., et al., *Complete Revascularization with Multivessel PCI for Myocardial Infarction*. N Engl J Med, 2019. **381**(15): p. 1411-1421.
- 306 5. Baine, K.R., et al., *Complete vs Culprit-Lesion-Only Revascularization for ST-Segment Elevation Myocardial Infarction: A Systematic Review and Meta-analysis*. JAMA Cardiol, 2020.
- 307 6. Rathod, K.S., et al., *Complete Versus Culprit-Only Lesion Intervention in Patients With Acute Coronary Syndromes*. J Am Coll Cardiol, 2018. **72**(17): p. 1989-1999.
- 308 7. Thim, T., et al., *Evaluation and Management of Nonculprit Lesions in STEMI*. JACC Cardiovasc Interv, 2020. **13**(10): p. 1145-1154.
- 309 8. Tonino, P.A., et al., *Fractional flow reserve versus angiography for guiding percutaneous coronary intervention*. N Engl J Med, 2009. **360**(3): p. 213-24.
- 310 9. van Nunen, L.X., et al., *Fractional flow reserve versus angiography for guidance of PCI in patients with multivessel coronary artery disease (FAME): 5-year follow-up of a randomised controlled trial*. Lancet, 2015. **386**(10006): p. 1853-60.
- 311 10. Masrani Mehta, S., et al., *Association of Lower Fractional Flow Reserve Values With Higher Risk of Adverse Cardiac Events for Lesions Deferred Revascularization Among Patients With Acute Coronary Syndrome*. J Am Heart Assoc, 2015. **4**(8): p. e002172.
- 312 11. Hakeem, A., et al., *Long-Term Prognosis of Deferred Acute Coronary Syndrome Lesions Based on Nonischemic Fractional Flow Reserve*. J Am Coll Cardiol, 2016. **68**(11): p. 1181-1191.
- 313 12. Virmani, R., et al., *Lessons from sudden coronary death: a comprehensive morphological classification scheme for atherosclerotic lesions*. Arterioscler Thromb Vasc Biol, 2000. **20**(5): p. 1262-75.
- 314 13. Bentzon, J.F., et al., *Mechanisms of plaque formation and rupture*. Circ Res, 2014. **114**(12): p. 1852-66.
- 315 14. Jang, I.K., et al., *In vivo characterization of coronary atherosclerotic plaque by use of optical coherence tomography*. Circulation, 2005. **111**(12): p. 1551-5.
- 316 15. Kato, K., et al., *Nonculprit plaques in patients with acute coronary syndromes have more vulnerable features compared with those with non-acute coronary syndromes: a 3-vessel optical coherence tomography study*. Circ Cardiovasc Imaging, 2012. **5**(4): p. 433-40.
- 317 16. Maejima, N., et al., *Morphological features of non-culprit plaques on optical coherence tomography and integrated backscatter intravascular ultrasound in patients with acute coronary syndromes*. Eur Heart J Cardiovasc Imaging, 2015. **16**(2): p. 190-7.
- 318 17. Bom, M.J., et al., *Early Detection and Treatment of the Vulnerable Coronary Plaque: Can We Prevent Acute Coronary Syndromes?* Circ Cardiovasc Imaging, 2017. **10**(5).
- 319 18. Stone, G.W., et al., *A prospective natural-history study of coronary atherosclerosis*. N Engl J Med, 2011. **364**(3): p. 226-35.
- 320 19. Waksman, R., et al., *Identification of patients and plaques vulnerable to future coronary events with near-infrared spectroscopy intravascular ultrasound imaging: a prospective, cohort study*. Lancet, 2019. **394**(10209): p. 1629-1637.
- 321 20. Kini, A.S., et al., *Fibrous Cap Thickness by Optical Coherence Tomography In Vivo*. J Am Coll Cardiol, 2017. **69**(6): p. 644-657.
- 322 21. Prati, F., et al., *Expert review document on methodology, terminology, and clinical applications of optical coherence tomography: physical principles, methodology of image*

- 1  
2  
3 350 *acquisition, and clinical application for assessment of coronary arteries and atherosclerosis.*  
4 351 *Eur Heart J*, 2010. **31**(4): p. 401-15.
- 5 352 22. Tearney, G.J., et al., *Consensus standards for acquisition, measurement, and reporting of*  
6 353 *intravascular optical coherence tomography studies: a report from the International Working*  
7 354 *Group for Intravascular Optical Coherence Tomography Standardization and Validation.* *J Am*  
8 355 *Coll Cardiol*, 2012. **59**(12): p. 1058-72.
- 9 356 23. Engstrøm, T., et al., *Complete revascularisation versus treatment of the culprit lesion only in*  
10 357 *patients with ST-segment elevation myocardial infarction and multivessel disease (DANAMI-*  
11 358 *3—PRIMULTI): an open-label, randomised controlled trial.* *Lancet*, 2015. **386**(9994): p. 665-  
12 359 71.
- 13 360 24. Smits, P.C., et al., *Fractional Flow Reserve-Guided Multivessel Angioplasty in Myocardial*  
14 361 *Infarction.* *N Engl J Med*, 2017. **376**(13): p. 1234-1244.
- 15 362 25. Wald, D.S., et al., *Randomized trial of preventive angioplasty in myocardial infarction.* *N Engl J*  
16 363 *Med*, 2013. **369**(12): p. 1115-23.
- 17 364 26. Layland, J., et al., *Fractional flow reserve vs. angiography in guiding management to optimize*  
18 365 *outcomes in non-ST-segment elevation myocardial infarction: the British Heart Foundation*  
19 366 *FAMOUS-NSTEMI randomized trial.* *Eur Heart J*, 2015. **36**(2): p. 100-11.
- 20 367 27. Calvert, P.A., et al., *Association between IVUS findings and adverse outcomes in patients with*  
21 368 *coronary artery disease: the VIVA (VH-IVUS in Vulnerable Atherosclerosis) Study.* *JACC*  
22 369 *Cardiovasc Imaging*, 2011. **4**(8): p. 894-901.
- 23 370 28. Cheng, J.M., et al., *In vivo detection of high-risk coronary plaques by radiofrequency*  
24 371 *intravascular ultrasound and cardiovascular outcome: results of the ATHEROREMO-IVUS*  
25 372 *study.* *Eur Heart J*, 2014. **35**(10): p. 639-47.
- 26 373 29. Burke, A.P., et al., *Coronary risk factors and plaque morphology in men with coronary disease*  
27 374 *who died suddenly.* *N Engl J Med*, 1997. **336**(18): p. 1276-82.
- 28 375 30. Narula, J., et al., *Histopathologic characteristics of atherosclerotic coronary disease and*  
29 376 *implications of the findings for the invasive and noninvasive detection of vulnerable plaques.* *J*  
30 377 *Am Coll Cardiol*, 2013. **61**(10): p. 1041-51.
- 31 378 31. Schuurman, A.S., et al., *Near-infrared spectroscopy-derived lipid core burden index predicts*  
32 379 *adverse cardiovascular outcome in patients with coronary artery disease during long-term*  
33 380 *follow-up.* *Eur Heart J*, 2018. **39**(4): p. 295-302.
- 34 381 32. Prati, F., et al., *Relationship between coronary plaque morphology of the left anterior*  
35 382 *descending artery and 12 months clinical outcome: the CLIMA study.* *Eur Heart J*, 2020. **41**(3):  
36 383 p. 383-391.
- 37 384 33. Kennedy, M.W., et al., *Combined optical coherence tomography morphologic and fractional*  
38 385 *flow reserve hemodynamic assessment of non- culprit lesions to better predict adverse event*  
39 386 *outcomes in diabetes mellitus patients: COMBINE (OCT-FFR) prospective study. Rationale and*  
40 387 *design.* *Cardiovasc Diabetol*, 2016. **15**(1): p. 144.
- 41 388 34. Kedhi, E., et al., *Combined Optical Coherence Tomography and Fractional Flow Reserve*  
42 389 *Assessment to Better Predict Adverse Event Outcomes in DM patients: Combine (OCT-FFR)*  
43 390 *Trial.* *Transcatheter Cardiovascular Therapeutics Annual Conference*, 14 Oktober, 2020.
- 44 391  
45  
46  
47  
48  
49  
50  
51  
52 392  
53  
54  
55  
56  
57  
58  
59  
60

1  
2  
3 393 **Figures**  
4

5 394 **Figure 1.** PECTUS-obs flowchart  
6

7 **Figure 1.** PECTUS-obs flowchart

8  
9 CAG, coronary angiography, FFR, fractional flow reserve, NSTEMI, Non- ST-elevation myocardial infarction, OCT,  
10 optical coherence tomography, STEMI, ST-elevation myocardial infarction  
11

12  
13 395

14  
15 396 **Figure 2.** Lesion assessment in the PECTUS-obs study  
16

17 **Figure 2.** Lesion assessment in the PECTUS-obs study

18  
19 **Upper left:** CAG shows a non-culprit lesion (red box) in the proximal RCA. The radiopaque marker  
20 inside the vessel at the location of the lesion represents the OCT lens.  
21

22  
23 **Lower left:** FFR- measurement of the lesion reveals that it is non flow-limiting (FFR = 0.94).  
24

25  
26 **Right:** OCT-imaging shows an atherosclerotic plaque with a lipid arc of 200° and a minimal fibrous  
27 cap thickness of 4 µm. This lesion therefore meets the criteria for a vulnerable plaque.  
28

29 CAG, coronary angiography, FFR, fractional flow reserve, OCT, optical coherence tomography, RCA, right coronary  
30 artery  
31

32 397  
33  
34  
35  
36  
37  
38  
39  
40  
41  
42  
43  
44  
45  
46  
47  
48  
49  
50  
51  
52  
53  
54  
55  
56  
57  
58  
59  
60

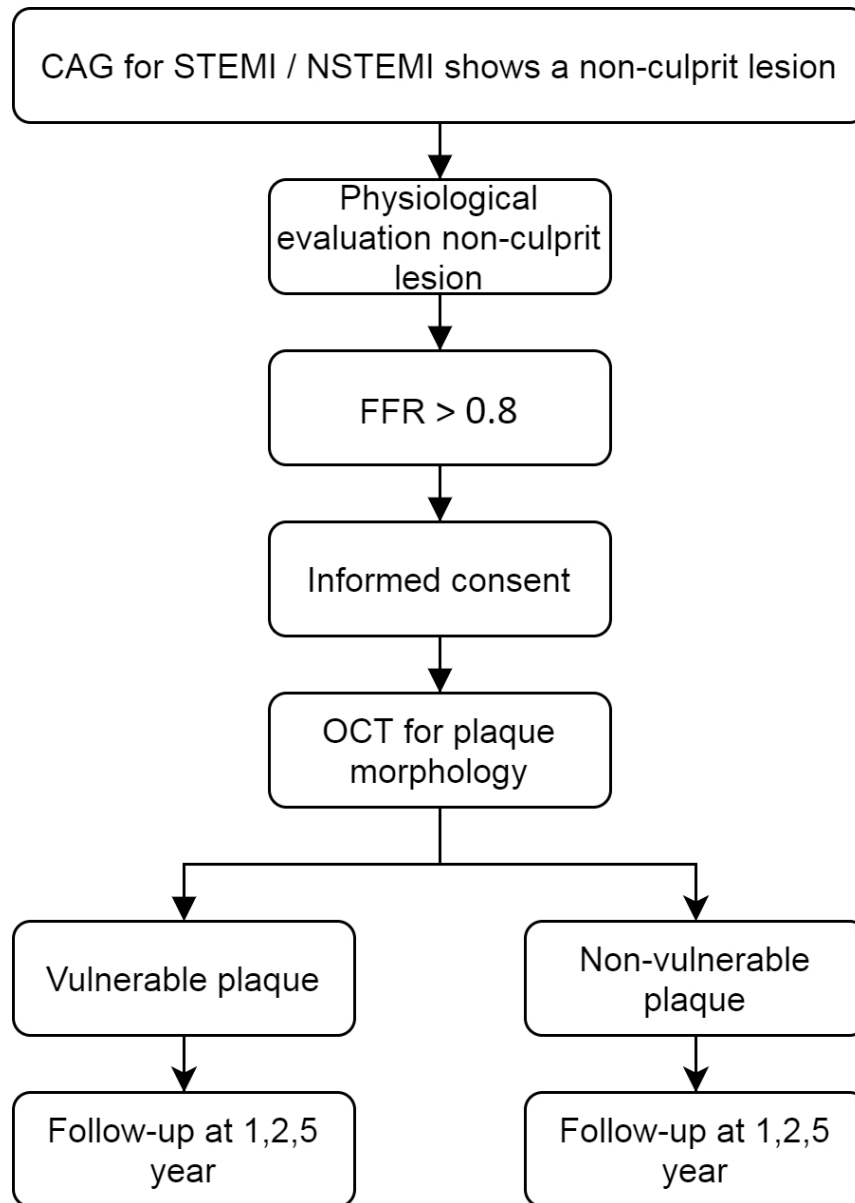

Figure 1. PECTUS-obs flowchart

46 CAG, coronary angiography, FFR, fractional flow reserve, NSTEMI, Non- ST-elevation myocardial infarction,  
47 OCT, optical coherence tomography, STEMI, ST-elevation myocardial infarction

50 318x445mm (72 x 72 DPI)

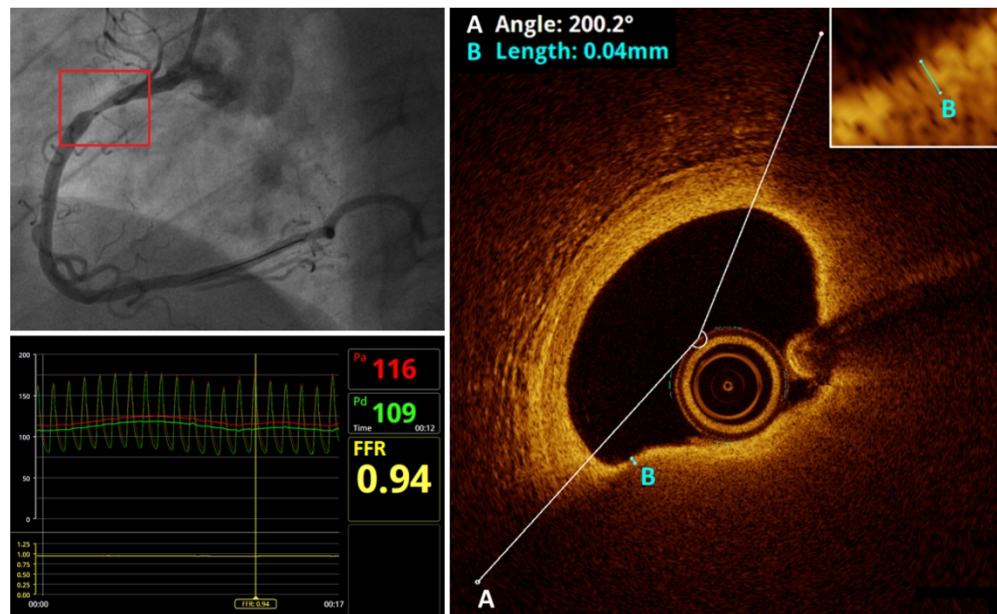

Figure 2. Lesion assessment in the PECTUS-obs study

Upper left: CAG shows a non-culprit lesion (red box) in the proximal RCA. The radiopaque marker inside the vessel at the location of the lesion represents the OCT lens.

Lower left: FFR- measurement of the lesion reveals that it is non flow-limiting (FFR = 0.94).

Right: OCT-imaging shows an atherosclerotic plaque with a lipid arc of 200° and a minimal fibrous cap thickness of 4  $\mu$ m. This lesion therefore meets the criteria for a vulnerable plaque.

CAG, coronary angiography, FFR, fractional flow reserve, OCT, optical coherence tomography, RCA, right coronary artery

274x167mm (120 x 120 DPI)



# BMJ Open

## Identification of anatomic risk factors for acute coronary events by Optical Coherence Tomography in patients with myocardial infarction and residual non-flow limiting lesions: Rationale and design of the PECTUS-obs study.

|                                 |                                                                                                                                                                                                                                                                                                                                                                                                                                                                                                                                                                                                                                                                                                                                                                                                                                                                                                                                                                                                                                                                                                                                                                                                                                                                                                                                                                                                                                          |
|---------------------------------|------------------------------------------------------------------------------------------------------------------------------------------------------------------------------------------------------------------------------------------------------------------------------------------------------------------------------------------------------------------------------------------------------------------------------------------------------------------------------------------------------------------------------------------------------------------------------------------------------------------------------------------------------------------------------------------------------------------------------------------------------------------------------------------------------------------------------------------------------------------------------------------------------------------------------------------------------------------------------------------------------------------------------------------------------------------------------------------------------------------------------------------------------------------------------------------------------------------------------------------------------------------------------------------------------------------------------------------------------------------------------------------------------------------------------------------|
| Journal:                        | <i>BMJ Open</i>                                                                                                                                                                                                                                                                                                                                                                                                                                                                                                                                                                                                                                                                                                                                                                                                                                                                                                                                                                                                                                                                                                                                                                                                                                                                                                                                                                                                                          |
| Manuscript ID                   | bmjopen-2021-048994.R1                                                                                                                                                                                                                                                                                                                                                                                                                                                                                                                                                                                                                                                                                                                                                                                                                                                                                                                                                                                                                                                                                                                                                                                                                                                                                                                                                                                                                   |
| Article Type:                   | Protocol                                                                                                                                                                                                                                                                                                                                                                                                                                                                                                                                                                                                                                                                                                                                                                                                                                                                                                                                                                                                                                                                                                                                                                                                                                                                                                                                                                                                                                 |
| Date Submitted by the Author:   | 29-Apr-2021                                                                                                                                                                                                                                                                                                                                                                                                                                                                                                                                                                                                                                                                                                                                                                                                                                                                                                                                                                                                                                                                                                                                                                                                                                                                                                                                                                                                                              |
| Complete List of Authors:       | Mol, Jan-Quinten; Radboudumc, cardiology<br>Belkacemi, Anouar; Isala Hospitals, Department of Cardiology<br>Volleberg, Rick; Radboudumc, Department of Cardiology<br>Meuwissen, Martijn; Amphia Hospital, Department of Cardiology<br>Protopopov, Aleksey; Regional state hospital, Cardiovascular Center<br>Laanmets, Peep; North Estonia Medical Centre, Department of Cardiology<br>Krestyaninov, Oleg; FSBI National Medical Research Center named after E N Meshalkin, Department of Cardiology<br>Dennert, Robert; Dr Horacio E Oduber Hospital, Department of Cardiology<br>Oemrawsingh, Rohit; Albert Schweitzer Hospital, Department of Cardiology<br>van Kuijk, Jan-Peter; Sint Antonius Hospital, Department of Cardiology<br>Arkenbout, Karin; Tergooi Hospitals, Department of Cardiology<br>van der Heijden, Dirk-Jan; Medisch Centrum Haaglanden, Cardiology<br>Rasoul, Saman; Zuyderland Medical Centre Heerlen; Maastricht Universitair Medisch Centrum+, Cardiology<br>Lipsic, Erik; University Medical Centre Groningen, Department of Cardiology<br>Teerenstra, Steven; Radboud University Medical Center, Department for Health Evidence<br>Camaro, Cyril; Radboudumc, Cardiology<br>Damman, P.; Radboudumc, Department of Cardiology<br>van Leeuwen, Maarten; Isala Hospitals, Department of Cardiology<br>van Geuns, Robert-Jan; Radboudumc, Cardiology<br>van Royen, Niels; Radboudumc, Department of Cardiology |
| <b>Primary Subject Heading</b>: | Cardiovascular medicine                                                                                                                                                                                                                                                                                                                                                                                                                                                                                                                                                                                                                                                                                                                                                                                                                                                                                                                                                                                                                                                                                                                                                                                                                                                                                                                                                                                                                  |
| Secondary Subject Heading:      | Cardiovascular medicine                                                                                                                                                                                                                                                                                                                                                                                                                                                                                                                                                                                                                                                                                                                                                                                                                                                                                                                                                                                                                                                                                                                                                                                                                                                                                                                                                                                                                  |
| Keywords:                       | Coronary heart disease < CARDIOLOGY, Coronary intervention < CARDIOLOGY, Myocardial infarction < CARDIOLOGY                                                                                                                                                                                                                                                                                                                                                                                                                                                                                                                                                                                                                                                                                                                                                                                                                                                                                                                                                                                                                                                                                                                                                                                                                                                                                                                              |
|                                 |                                                                                                                                                                                                                                                                                                                                                                                                                                                                                                                                                                                                                                                                                                                                                                                                                                                                                                                                                                                                                                                                                                                                                                                                                                                                                                                                                                                                                                          |

1  
2  
3  
4  
5  
6  
7  
8  
9  
10  
11  
12  
13  
14  
15  
16  
17  
18  
19  
20  
21  
22  
23  
24  
25  
26  
27  
28  
29  
30  
31  
32  
33  
34  
35  
36  
37  
38  
39  
40  
41  
42  
43  
44  
45  
46  
47  
48  
49  
50  
51  
52  
53  
54  
55  
56  
57  
58  
59  
60

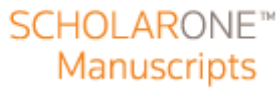



I, the Submitting Author has the right to grant and does grant on behalf of all authors of the Work (as defined in the below author licence), an exclusive licence and/or a non-exclusive licence for contributions from authors who are: i) UK Crown employees; ii) where BMJ has agreed a CC-BY licence shall apply, and/or iii) in accordance with the terms applicable for US Federal Government officers or employees acting as part of their official duties; on a worldwide, perpetual, irrevocable, royalty-free basis to BMJ Publishing Group Ltd ("BMJ") its licensees and where the relevant Journal is co-owned by BMJ to the co-owners of the Journal, to publish the Work in this journal and any other BMJ products and to exploit all rights, as set out in our [licence](#).

The Submitting Author accepts and understands that any supply made under these terms is made by BMJ to the Submitting Author unless you are acting as an employee on behalf of your employer or a postgraduate student of an affiliated institution which is paying any applicable article publishing charge ("APC") for Open Access articles. Where the Submitting Author wishes to make the Work available on an Open Access basis (and intends to pay the relevant APC), the terms of reuse of such Open Access shall be governed by a Creative Commons licence – details of these licences and which [Creative Commons](#) licence will apply to this Work are set out in our licence referred to above.

Other than as permitted in any relevant BMJ Author's Self Archiving Policies, I confirm this Work has not been accepted for publication elsewhere, is not being considered for publication elsewhere and does not duplicate material already published. I confirm all authors consent to publication of this Work and authorise the granting of this licence.

1  
2  
3  
4 1 **Identification of anatomic risk factors for acute coronary events by**  
5 2 **Optical Coherence Tomography in patients with myocardial**  
6 3 **infarction and residual non-flow limiting lesions: Rationale and**  
7 4 **design of the PECTUS-obs study.**  
8  
9  
10  
11  
12  
13

14 6 *Authors*

15  
16 7 J.H.Q. Mol<sup>1</sup>, MD, A. Belkacemi<sup>2</sup>, MD, PhD, R.H.J.A. Volleberg<sup>1</sup>, MD, M. Meuwissen<sup>3</sup>, MD, PhD, A.V.  
17 8 Protopopov<sup>4</sup>, MD, PhD, P. Laanmets<sup>5</sup>, MD, O.V. Krestyaninov<sup>6</sup>, MD, PhD, R. Dennert<sup>7</sup>, MD, PhD, R.M.  
18 9 Oemrawsingh<sup>8</sup>, MD, PhD, J.P. van Kuijk<sup>9</sup>, MD, PhD, E.K. Arkenbout<sup>10</sup>, MD, PhD, D.J. van der Heijden<sup>11</sup>,  
19 10 MD, PhD, S. Rasoul<sup>12</sup>, MD, PhD, E. Lipsic<sup>13</sup>, MD, PhD, S. Teerenstra<sup>14</sup>, MSc, PhD, C. Camaro<sup>1</sup>, MD, P.  
20 11 Damman<sup>1</sup>, MD, PhD, M.A.H. van Leeuwen<sup>2</sup>, MD, PhD, R.J. van Geuns<sup>1</sup>, MD, PhD, N. Van Royen<sup>1</sup>, MD,  
21 12 PhD  
22  
23  
24

25 13 *Institutions*

26  
27  
28 14 <sup>1</sup> Department of Cardiology, Radboud University Medical Center, Nijmegen, the Netherlands.

29  
30 15 <sup>2</sup> Department of Cardiology, Isala Hospitals, Zwolle, the Netherlands.

31  
32 16 <sup>3</sup> Department of Cardiology, Amphia Hospital, Breda, the Netherlands.

33  
34 17 <sup>4</sup> Cardiovascular Center of Regional State Hospital, Krasnoyarsk, Russia.

35  
36 18 <sup>5</sup> Cardiology Center, North Estonia Medical Center, Tallinn, Estonia.

37  
38 19 <sup>6</sup> Meshalkin National Medical Research Center, Novosibirsk, Russia.

39  
40 20 <sup>7</sup> Department of Cardiology, Dr. Horacio E. Oduber Hospital, Aruba.

41  
42 21 <sup>8</sup> Department of Cardiology, Albert Schweitzer Hospital, Dordrecht, the Netherlands.

43  
44 22 <sup>9</sup> Department of Cardiology, Sint Antonius Hospital, Nieuwegein, the Netherlands.

45  
46 23 <sup>10</sup> Department of Cardiology, Tergooi Hospital, Blaricum, the Netherlands.

47  
48 24 <sup>11</sup> Department of Cardiology, Haaglanden Medical Center, The Hague, the Netherlands.

49  
50 25 <sup>12</sup> Department of Cardiology, Zuyderland Medical Center, Heerlen, the Netherlands.

51  
52 26 <sup>13</sup> Department of Cardiology, University Medical Center Groningen, Groningen, the Netherlands.

53  
54  
55 27 <sup>14</sup> Department of Epidemiology, Biostatistics and Health Technology Assessment, Radboud University  
56 28 Medical Center, Nijmegen, The Netherlands.  
57  
58  
59  
60

1  
2  
3  
4  
5  
6  
7  
8  
9  
10  
11  
12  
13  
14  
15  
16  
17  
18  
19  
20  
21  
22  
23  
24  
25  
26  
27  
28  
29  
30  
31  
32  
33  
34  
35  
36  
37  
38  
39  
40  
41  
42  
43  
44  
45  
46  
47  
48  
49  
50  
51  
52  
53  
54  
55  
56  
57  
58  
59  
60

29

30

31 *Word count*

32 2799

33

34 *Keywords*

35 Myocardial Infarction (MI), Non-culprit Lesion, Fractional Flow Reserve (FFR), Optical Coherence

36 Tomography (OCT), Vulnerable Plaque

37

38 *Address for correspondence*

39 Prof. Niels van Royen, MD, PhD

40 Radboud University Medical Center

41 PO Box 9101, 6500 HB, Nijmegen

42 The Netherlands

43 Niels.vanRoyen@radboudumc.nl

44

45

## 46 **Abstract**

### 47 **Introduction**

48 In patients with myocardial infarction, the decision to treat a non-culprit lesion is generally based on  
49 its physiological significance. However, deferral of revascularization based on non-ischemic fractional  
50 flow reserve (FFR) values in these patients results in less favorable outcomes compared to patients  
51 with stable coronary artery disease (CAD), potentially caused by vulnerable non-culprit lesions.  
52 Intravascular optical coherence tomography (OCT) imaging allows for in vivo morphological  
53 assessment of plaque 'vulnerability', and might aid in the detection of FFR-negative lesions at high  
54 risk for recurrent events.

### 55 **Methods and analysis**

56 The PECTUS-obs study is an international multicenter prospective observational study that aims to  
57 relate OCT-derived vulnerable plaque characteristics of non-flow limiting, non-culprit lesions to  
58 clinical outcome in patients with myocardial infarction. A total of 438 patients presenting with  
59 myocardial infarction (STEMI and NSTEMI) will undergo OCT-imaging of any FFR-negative non-culprit  
60 lesion for detection of plaque vulnerability. The primary study endpoint is a composite of Major  
61 Adverse Cardiovascular Events (all-cause mortality, non-fatal myocardial infarction, or unplanned  
62 revascularization) at 2-year follow-up. Secondary endpoints will be the same composite at 1- and 5-  
63 year follow-up, target vessel failure, target vessel revascularization, target lesion failure and target  
64 lesion revascularization.

### 65 **Ethics and dissemination**

66 This study has been approved by the Medical Ethics Committee of the region Arnhem-Nijmegen. The  
67 results of this study will be disseminated in a main paper and additional papers with subgroup  
68 analyses.

1  
2  
3 69 **Registered under NCT03857971 on 28-02-2019**  
4  
5

6 70  
7

8  
9 **Strengths and limitations of this study**

- 10  
11 72 • The PECTUS-obs is the first prospective study to assess the incremental value of OCT imaging  
12  
13 73 of FFR-deferred non-culprit lesions in patients presenting with MI.  
14  
15 74 • OCT is the only imaging modality with a spatial resolution high enough to truly measure  
16  
17 75 fibrous cap thickness, the plaque feature most associated with adverse events.  
18  
19 76 • In PECTUS-obs, OCT imaging will only be performed at baseline. However, any new MI or  
20  
21 77 revascularization will be allocated to a specific coronary vessel and lesion by comparison of  
22  
23 78 the baseline and follow-up angiograms.  
24  
25 79 • If intracoronary imaging with OCT is able to identify lesions associated with worse outcome,  
26  
27 80 this might warrant studies on focal or pharmacological intervention of OCT-determined  
28  
29 81 vulnerable plaques.  
30  
31  
32  
33  
34  
35  
36  
37  
38  
39 84  
40  
41  
42  
43  
44  
45  
46  
47  
48  
49  
50  
51  
52  
53  
54  
55  
56  
57  
58  
59  
60

## 85 Introduction

86 In patients presenting with myocardial infarction (MI), percutaneous coronary intervention (PCI) of  
87 the culprit lesion is the standard method of treatment. [1] A high percentage of these patients have  
88 additional lesions at different sites in the coronary arteries, not responsible for the acute event. The  
89 optimal treatment of these non-culprit lesions is subject of extensive research, because their  
90 presence confers a greater risk of future major adverse cardiac events (MACE) [2, 3]. Recent studies  
91 showed that complete revascularization results in improved outcomes compared to treatment of the  
92 culprit lesion only. [4-6] However, non-selective revascularization of all non-culprit lesions may lead  
93 to overtreatment.

94 The selection of non-culprit lesions qualifying for revascularization is often based on whether a  
95 lesions causes ischemia, as determined by invasive measurements such as the fractional flow reserve  
96 (FFR). [7] In patients with stable coronary artery disease (CAD), FFR-guided complete  
97 revascularization results in better outcomes compared to angiography guided complete  
98 revascularization. [8] Nevertheless, the MACE rates at longer term follow-up remains significant in  
99 the presence of non-significant CAD. [9] In patients presenting with MI this recurrence rate of  
100 ischemic events is even higher. [10] A recent study demonstrated a MACE rate of 23% in acute  
101 coronary syndrome (ACS) patients vs. 11% in patients with stable CAD at 3.4-years follow-up, after  
102 FFR based deferral of revascularization. Among these ACS patients, especially those presenting with  
103 NSTEMI had a high event rate (42%). [11]

104 Apart from coronary physiology, the structural components of non-culprit lesions might provide  
105 other markers for future adverse events. Autopsy studies have granted insight into the lesion  
106 characteristics that are associated with plaque rupture, and subsequent MI or sudden death. These  
107 lesions tend to contain a large lipid pool with a thin overlying fibrous cap, and display a large degree  
108 of outward remodeling. [12, 13] These 'thin-cap fibroatheromas' (TCFA) are more frequently  
109 observed in both culprit- and non-culprit lesions of patients presenting with MI than in patients



1  
2  
3 110 presenting with stable CAD, and are a strong predictor of culprit plaque rupture in ACS. [14-17]  
4

5 111 Therefore, screening for vulnerable plaques on top of physiological measurements, should be  
6

7 112 evaluated for non-culprit lesions.  
8  
9

10 113 Analysis of lesion composition can be performed in vivo with the use of intravascular imaging  
11

12 114 techniques such as intravascular ultrasound (IVUS), near infrared spectroscopy (NIRS) and optical  
13

14 115 coherence tomography (OCT). [18] Prospective studies using IVUS and NIRS showed that  
15

16 116 identification of lesions at higher risk for future events is feasible. [19, 20] However, OCT might prove  
17

18 117 more suitable for this purpose, due to its specific characteristics. OCT has a 10-20 times higher spatial  
19

20 118 resolution than IVUS, allowing for better detection of TCFA. Moreover, a complete acquisition of a  
21

22 119 coronary segment can be provided within a couple of seconds, with a single pullback. Last,  
23

24 120 (semi)automated analysis of images is more feasible due to the high resolution of the acquired  
25

26 121 images. [21] Nevertheless, OCT has yet to be prospectively validated for its ability to identify lesions  
27

28 122 at risk for future MACE in MI patients.  
29  
30  
31  
32

33 123 For future studies on potential preventive revascularization or more aggressive pharmacological  
34

35 124 therapy in patients with high risk lesions, prospective studies with clinical outcomes are imperative.  
36

37 125 In the PECTUS-obs study, we aim to relate OCT-derived plaque characteristics of not significantly flow  
38

39 126 limiting, non-culprit lesions to clinical outcome in patients presenting with MI.  
40  
41  
42  
43

44 127  
45  
46  
47  
48  
49  
50  
51  
52  
53  
54  
55  
56  
57  
58  
59  
60

## 128 **Methods and analysis**

### 129 *Overview*

130 The PECTUS-obs study is designed as an international multicenter prospective observational study.  
 131 Eligible patients have to undergo an index CAG during hospitalization for an acute myocardial  
 132 infarction, which reveals one or more non-culprit lesions accessible for imaging with OCT. FFR-  
 133 measurements of these non-culprit lesions are made during the same index procedure, or during a  
 134 staged procedure. Any FFR-nonsignificant lesions are subsequently imaged with OCT. Additional  
 135 criteria are listed in table 1. A total of 438 patients will be included. A flow-chart of the study design  
 136 is depicted in figure 1.

**Table 1. Inclusion- and exclusion criteria**

| Inclusion criteria                                                                                                                                                                                                                                                                                                                                                                                                                                                                                                                                                                                                                                                                                                    | Exclusion criteria                                                                                                                                                                                                                                                                                                                                                                                                                                                                                                                                                                                                                                                                                            |
|-----------------------------------------------------------------------------------------------------------------------------------------------------------------------------------------------------------------------------------------------------------------------------------------------------------------------------------------------------------------------------------------------------------------------------------------------------------------------------------------------------------------------------------------------------------------------------------------------------------------------------------------------------------------------------------------------------------------------|---------------------------------------------------------------------------------------------------------------------------------------------------------------------------------------------------------------------------------------------------------------------------------------------------------------------------------------------------------------------------------------------------------------------------------------------------------------------------------------------------------------------------------------------------------------------------------------------------------------------------------------------------------------------------------------------------------------|
| <p style="text-align: center;"><b>Clinical</b></p> <ul style="list-style-type: none"> <li>- Age <math>\geq</math> 18 years</li> <li>- Hospitalization with a STEMI or NSTEMI for which patient is subjected to invasive coronary angiography (within the last 6 weeks).</li> </ul> <p style="text-align: center;"><b>Angiographical</b></p> <ul style="list-style-type: none"> <li>- Patient has <math>\geq</math> 1 non-culprit, target lesion(s) with following additional characteristics:               <ul style="list-style-type: none"> <li>o Lesion has visual stenosis of 30-90%.</li> <li>o Lesion is non-obstructive (FFR &gt; 0.80).</li> <li>o Lesion is not in-stent restenosis.</li> </ul> </li> </ul> | <p style="text-align: center;"><b>Clinical</b></p> <ul style="list-style-type: none"> <li>- Pregnancy.</li> <li>- Hemodynamic instability, respiratory failure, or Killip class <math>\geq</math> 3 at time of inclusion.</li> <li>- Previous CABG.</li> <li>- Indication for revascularization by CABG.</li> <li>- Estimated life expectancy &lt; 3 year.</li> </ul> <p style="text-align: center;"><b>Angiographical</b></p> <ul style="list-style-type: none"> <li>- Anatomy of target lesion(s) is unsuitable for OCT catheter crossing or imaging (aorta-ostial lesions, too small diameter segment, severe calcifications, chronic total occlusion, distal lesions prohibiting OCT imaging).</li> </ul> |
| <p><b>Table 1. Inclusion- and exclusion criteria</b><br/>           CABG, coronary artery bypass grafting, FFR, fractional flow reserve, NSTEMI, Non- ST-elevation myocardial infarction, OCT, optical coherence tomography, STEMI, ST-elevation myocardial infarction</p>                                                                                                                                                                                                                                                                                                                                                                                                                                            |                                                                                                                                                                                                                                                                                                                                                                                                                                                                                                                                                                                                                                                                                                               |

137

1  
2  
3 138 *Patients and enrolment*  
4  
5

6 139 Patients presenting with MI (ST-elevation and non ST-elevation) are screened for potential inclusion  
7  
8 140 in the study. Patients are treated according to the current guidelines for the management of ACS,  
9  
10 141 including referral for CAG and (potential) PCI of the culprit artery. In case of one or more non-culprit  
11  
12 142 lesions of intermediate stenosis (30-90%), clinically indicated FFR measurements are performed in  
13  
14 143 order to determine if these non-culprit stenoses are hemodynamically significant (figure 2). If a  
15  
16 144 stenosis is non-significant (FFR > 0.8) and the patient is eligible for inclusion based on the criteria  
17  
18 145 listed in table 1, informed consent is obtained for participation in the study. If the FFR is  $\leq 0.80$   
19  
20 146 (hemodynamically significant), the patient is revascularized according to the current therapeutic  
21  
22 147 guidelines.  
23  
24  
25  
26

27 148 *Timing of FFR measurements and informed consent*  
28  
29

30 149 FFR measurements of non-culprit lesions are performed either during the index CAG, or during a  
31  
32 150 staged procedure within 6 weeks. If non-culprit lesions are assessed during the index procedure,  
33  
34 151 patients are approached for participation after revascularization of the culprit artery and any FFR  
35  
36 152 measurements. After oral consent, the OCT pullbacks are performed of all FFR-negative stenosis.  
37  
38 153 Written informed consent is acquired after the procedure. If non-culprit lesion will be evaluated  
39  
40 154 during a staged procedure, written informed consent is acquired prior to the staged procedure.  
41  
42  
43

44 155 *OCT-imaging*  
45  
46

47 156 After administration of intracoronary nitrates an OCT pullback of the target lesion is acquired using  
48  
49 157 the FD-OCT ILUMIEN system (Abbott, USA) over a normal 0.14" guidewire or pressure wire. The OCT  
50  
51 158 system is CE marked and deployed as intended by the manufacturer. For effective clearing of blood  
52  
53 159 from the imaging field angiographic contrast media is injected. For the average coronary vessel 14 ml  
54  
55 160 of contrast media is injected using an automated injector at a rate of 4 mL/s at 300 PSI. The contrast  
56  
57 161 amount and/or infusion rate can be adjusted proportionally to coronary artery diameter to ensure  
58  
59  
60

1  
2  
3 162 good image quality. The segment of interest is scanned with a pull-back speed of 18 mm/sec (54mm  
4  
5 163 segment). The entire OCT-pullback is recorded simultaneously with fluoroscopy to ensure that the  
6  
7 164 anatomy of the OCT pullback can be linked to the angiogram. Multiple runs are allowed in case of  
8  
9  
10 165 poor image quality. In case of multiple target lesions eligible for OCT imaging, OCT imaging of each  
11  
12 166 target lesion is performed. OCT images are not used for procedural guidance.  
13  
14

#### 15 167 *Blood sampling*

16  
17  
18 168 During CAG, after OCT imaging is performed, 10ml of blood is drawn from the arterial sheath. This  
19  
20 169 blood is used for determination of biomarkers for plaque- or patient vulnerability.  
21  
22

#### 23 170 *OCT-imaging analysis*

24  
25  
26 171 OCT-images and corresponding angiograms are analyzed off-line by trained personnel in an OCT  
27  
28 172 core-laboratory. Evaluation of the images is based on tissue characteristics as previously described in  
29  
30 173 OCT expert consensus papers. [22, 23] A plaque is deemed 'vulnerable' if it contains two of the  
31  
32 174 following characteristics: a lipid arc of  $\geq 90^\circ$ , a cap thickness of  $< 65 \mu\text{m}$  and either cap rupture or  
33  
34 175 thrombus formation. An example of a vulnerable plaque with a lipid arc of  $>90^\circ$  and a cap thickness  $<$   
35  
36 176  $65 \mu\text{m}$  is shown in figure 2.  
37  
38  
39

#### 40 177 *Study end points*

41  
42  
43  
44 178 The primary study endpoint consists of a composite of major adverse cardiovascular events (all-cause  
45  
46 179 mortality, non-fatal MI (STEMI or NSTEMI), or unplanned revascularization) at 2-year follow-up in  
47  
48 180 patients with a vulnerable plaque as compared to patients without a vulnerable plaque. Secondary  
49  
50 181 endpoints are: MACE at 1- and 5-year follow-up, target vessel failure, target vessel revascularization,  
51  
52 182 target lesion failure and target lesion revascularization.  
53  
54

#### 55 183 *Exploratory analyses*

1  
2  
3 184 Additional exploratory analyses will be performed by comparing non-culprit plaque characteristics in  
4  
5 185 patients presenting with STEMI vs. NSTEMI, in diabetic vs non-diabetic patients, and in male vs.  
6  
7 186 female patients. Plaque morphology will also be related to angiographic lesion features. Moreover, in  
8  
9 187 order to accelerate the process of OCT-imaging interpretation, automated detection of  
10  
11 188 morphological features associated with MACE, will be developed with the use of machine learning.  
12  
13  
14

15 189 *Follow-up and endpoint adjudication*

16  
17  
18 190 At 1-, 2- and 5-years patients are followed-up by telephone contact. Medical records (including  
19  
20 191 coronary angiograms) from participating centers, general practitioners, and other medical centers  
21  
22 192 are used for the verification of endpoints. Additionally, mortality data is obtained from national  
23  
24 193 registries. A clinical event adjudication committee blinded to OCT-data will assess endpoints,  
25  
26 194 separate cardiovascular mortality from non-cardiovascular mortality, and allocate any new MI or  
27  
28 195 revascularization to a specific coronary vessel and lesion by comparison of the baseline and follow-up  
29  
30 196 angiograms.  
31  
32  
33

34  
35 197 *Sample size calculation and statistical analysis*

36  
37  
38 198 The total sample size is calculated at 438 patients. The sample size is calculated to provide 90%  
39  
40 199 power with a one sided alpha of 0.025 to identify OCT variables associated with non-culprit lesion  
41  
42 200 related major adverse cardiovascular events. It is based on the assumption that high risk OCT defined  
43  
44 201 vulnerable plaques are identified in 60% of targeted lesions, on a total event rate of 25% after two  
45  
46 202 years in FFR deferred lesions in patients with MI [11, 24], and an expected hazard ratio of at least 3.5  
47  
48 203 for OCT defined vulnerable plaques. [19] A power of 80% is maintained when the hazard ratio is  
49  
50 204 lower than expected but at least 2.0, or when the event rate is lower than expected but at least 10%.  
51  
52 205 Estimated loss to follow up is 5%, and inadequate OCT scans prohibiting assessment of vulnerable  
53  
54 206 plaque characteristics are expected in 5% of cases.  
55  
56  
57  
58  
59  
60

1  
2  
3 207 At 2-year follow-up, MACE in patients with vulnerable plaque characteristics will be compared to  
4  
5 208 patients without vulnerable plaque characteristics in terms of the hazard ratio. Descriptives will be  
6  
7 209 expressed as mean  $\pm$  SD (continuous data) or as frequencies and proportions (categorical data).  
8  
9  
10 210 Continuous variables are presented as mean SD if normally distributed, or median [interquartile  
11  
12 211 range] if not normally distributed. Categorical variables are presented as counts and percentages.  
13  
14 212 Continuous variables are compared between groups using the Student t test or its nonparametric  
15  
16 213 equivalent Mann-Whitney U test. The chi-square test (for comparison of proportions) will be  
17  
18 214 performed where appropriate. Multivariate Cox proportional hazard regression will be used to  
19  
20 215 correct for differences in baseline characteristics like age, sex, diabetes mellitus, hypertension,  
21  
22 216 dyslipidemia, indication for CAG (STEMI vs NSTEMI), history of MI and history of PCI if necessary. All  
23  
24 217 calculations will be generated by statistical package for social sciences software (SPSS Statistics  
25  
26 218 version 24; IBM Corp., Armonk, NY, USA).

### 219 *Patient and public involvement*

220 Patients were not involved in the design of this study.

### 221 **Current status**

222 Recruitment commenced in December 2018 and was completed in September 2020. With 2 year  
223 follow-up for the primary endpoint, reporting on the study is expected in the beginning of 2023.

### 224 **Discussion**

225 The PECTUS-obs study was designed to investigate the association between OCT-determined  
226 characteristics of plaque vulnerability and future major adverse cardiac events in non-flow limiting,  
227 non-culprit lesions of patients presenting with MI.

228 In current practice, the decision whether or not to preventively treat a non-culprit lesion is primarily  
229 based on its physiological significance. Although this strategy is clearly superior in stable CAD, it has

1  
2  
3 230 yet to be proven in patients presenting with MI. [8] In STEMI, several large randomized trials have  
4  
5 231 shown that FFR-guided complete revascularization results in fewer MACE compared to culprit-only  
6  
7 232 revascularization. [25, 26] However, randomized controlled trials directly comparing FFR-guided  
8  
9 233 complete revascularization with angiography-guided complete revascularization in STEMI have not  
10  
11 234 yet been conducted, and the only two studies showing a reduction in major clinical endpoints (death  
12  
13 235 and MI) after non-culprit revascularization were actually guided by angiography rather than  
14  
15 236 physiology. [4, 27] For patients with NSTEMI, the evidence is even more scarce. In the only available  
16  
17 237 randomized trial, the FAMOUS-NSTEMI trial, MACE rates at 1-year follow-up did not differ between  
18  
19 238 patients with FFR-guided and angiography guided treatment (8.0% vs 8.6%). [28] However, this study  
20  
21 239 was primarily designed to evaluate the effect of FFR-measurements on management decisions, and  
22  
23 240 was not powered to assess between-group differences in clinical outcomes. The ongoing SLIM trial  
24  
25 241 (NCT03562572) aims to address this gap in knowledge. Nevertheless, even if FFR-guided complete  
26  
27 242 revascularization proves superior in patients with MI, the long term MACE rate remains significant.  
28  
29 243 [11] It therefore remains unclear if non-culprit lesion selection based solely on FFR is sufficient, or if  
30  
31 244 other features like plaque morphology need to be taken into account.  
32  
33  
34  
35  
36  
37 245 In previous prospective intravascular imaging studies, plaque morphology has consistently been  
38  
39 246 analyzed using IVUS. In the PROSPECT study, 697 ACS patients were subjected to three-vessel  
40  
41 247 radiofrequency (RF)-IVUS imaging. [19] All atherosclerotic lesions found in the recordings were  
42  
43 248 subsequently analyzed for plaque composition. After a median follow-up of 3.4 years, researchers  
44  
45 249 found that non-culprit lesions with a minimal lumen area (MLA) of 4.0 mm<sup>2</sup> or less, a plaque burden  
46  
47 250 of 70% or greater, and those classified as TCFA were associated with a higher rate of MACE.  
48  
49  
50  
51 251 Following PROSPECT, several other studies confirmed the association between RF-IVUS-derived  
52  
53 252 vulnerable plaques and MACE. [29, 30] The main limitation of RF-IVUS when it comes to identifying  
54  
55 253 TCFAs is its poor resolution. In the landmark study by Burke et al., 95% of ruptured plaques had a  
56  
57 254 fibrous cap thickness of less than 65µm. [31] More recent reports found that cap thickness of lesions  
58  
59 255 classified as TCFA ranges from 54-84µm. [32] RF-IVUS has a spatial resolution of approximately 150

1  
2  
3 256  $\mu\text{m}$ , leaving it below the detection range for cap thickness in these lesions. Moreover, of all plaque  
4  
5 257 features that are related with adverse outcomes, cap thickness seems to be the most important. [32]  
6  
7 258 As mentioned earlier, with a spatial resolution of approximately  $10\mu\text{m}$ , we expect that OCT is more  
8  
9 259 suitable for identifying TCFA. However, prospective data on the association between OCT-derived  
10  
11 260 vulnerable plaques and future events are limited. Recently, the arsenal of invasive imaging modalities  
12  
13 261 was broadened by NIRS. The ATHEROREMO-NIRS study proved that NIRS-derived lipid core burden  
14  
15 262 index (LCBI) was associated with MACE at a patient level, whereas the LRP study later expanded on  
16  
17 263 this observation by showing that NIRS can also identify plaques vulnerable to future MACE. [20, 33]  
18  
19  
20  
21 264 The CLIMA study investigated the association between a predefined combination of four high risk  
22  
23 265 plaque features (MLA  $<3.5\text{ mm}^2$ , fibrous cap thickness  $<75\mu\text{m}$ , a lipid arc  $>180^\circ$ , and the presence of  
24  
25 266 macrophage clusters) and clinical events in patients that underwent OCT imaging of the proximal  
26  
27 267 LAD. [34] This combination of features proved to be an independent predictor of events with a  
28  
29 268 hazard ratio of 7.54. However, this study differed from the current design in several aspects. Even  
30  
31 269 though CLIMA involved prospective follow-up, patients were only included after undergoing OCT-  
32  
33 270 imaging for a clinical indication. Moreover, imaging had to be performed on a predefined segment  
34  
35 271 (proximal-mid LAD) that could not include, or be adjacent to, a stenosis of  $\geq 50\%$ . Therefore OCT-  
36  
37 272 imaging in this study was used to screen a fixed vessel segment that was relatively free of stenosis,  
38  
39 273 whereas the PECTUS-obs evaluates targeted OCT-imaging of angiographically determined stenoses of  
40  
41 274 intermediate severity that are FFR-negative.  
42  
43  
44  
45  
46  
47 275 The COMBINE study shares more similarities with the current study design. [35] In this prospective  
48  
49 276 registry of patients with diabetes requiring invasive angiography, OCT imaging of FFR non-flow  
50  
51 277 limiting lesions revealed that patients with TCFA had increased target lesion related MACE  
52  
53 278 compared to patients without TCFA (13.3% vs. 9.7%) at 18 month follow-up. [36] In this study  
54  
55 279 however, only 25% of included patients had presented with an ACS at baseline.  
56  
57  
58  
59  
60



1  
2  
3 280 The current prospective observational study could serve as an important step towards OCT imaging-  
4  
5 281 guided treatment of non-culprit lesions. However, randomized trials need to be conducted in order  
6  
7 282 to evaluate the efficacy of OCT-based interventions. This was attempted in a previous trial in which  
8  
9 283 preemptive stenting of FFR-negative OCT-identified vulnerable plaques with ABSORB bioresorbable  
10  
11 284 vascular scaffolds (BVS) was compared to optimal medicinal therapy alone. [37] Unfortunately this  
12  
13 285 trial was stopped prematurely because the ABSORB BVS was retracted from the market. The  
14  
15 286 currently enrolling PREVENT trial (NCT02316886) also aims to evaluate imaging-guided preemptive  
16  
17 287 stenting, although it utilizes IVUS and NIRS in addition to OCT. Lastly the recently published  
18  
19 288 PROSPECT ABSORB trial showed good safety outcomes after IVUS/NIRS-guided preemptive stenting,  
20  
21 289 while it was not powered for clinical endpoints.[38]  
22  
23  
24  
25

## 26 290 **Conclusion**

27  
28  
29  
30 291 The PECTUS-obs is the first prospective study to assess the incremental value of OCT imaging of FFR-  
31  
32 292 deferred non-culprit lesions in patients presenting with MI. If intracoronary imaging with OCT is able  
33  
34 293 to identify lesions associated with worse outcome, this might warrant studies on focal or  
35  
36 294 pharmacological intervention of OCT-determined vulnerable plaques.  
37  
38  
39

## 40 295 **Ethics and dissemination**

41  
42  
43 296 This study has been approved by the Medical Ethics Committee of the region Arnhem-Nijmegen (file  
44  
45 297 number 2018-4763). All participants gave informed consent prior to inclusion in the study. The  
46  
47 298 results of this study will be disseminated in a main paper and additional papers with subgroup  
48  
49 299 analyses.  
50  
51  
52

## 53 300 **Author contributions**

54  
55  
56  
57 301 NvR conceived the idea. NvR and JHQM designed the study protocol. ST designed the statistical  
58  
59 302 analyses. JHQM and NvR drafted the manuscript. AB, RHJAV, MM, AVP, PL, OVK, RD, RMO, JpV, EKA,  
60

1  
2  
3 303 DJvdH, SR, EL, CC, PD, MAHVl and RJvG provided critical revisions and substantial intellectual input.  
4

5 304 All authors agreed with the final version of the manuscript.  
6  
7

8  
9 **305 Competing interests**

10  
11  
12 306 None declared.  
13  
14

15 **307 Funding**

16  
17 308 This study was financially supported by Abbott Vascular, and Health Holland. Grant numbers are not  
18

19  
20 309 applicable.  
21  
22

23 310  
24  
25

26 311  
27  
28  
29  
30  
31  
32  
33  
34  
35  
36  
37  
38  
39  
40  
41  
42  
43  
44  
45  
46  
47  
48  
49  
50  
51  
52  
53  
54  
55  
56  
57  
58  
59  
60

312 *References*

- 313 1. Neumann, F.J., et al., *2018 ESC/EACTS Guidelines on myocardial revascularization*. Eur Heart J, 2019. **40**(2): p. 87-165.
- 314 2. Glaser, R., et al., *Clinical progression of incidental, asymptomatic lesions discovered during culprit vessel coronary intervention*. Circulation, 2005. **111**(2): p. 143-9.
- 315 3. Goldstein, J.A., et al., *Multiple complex coronary plaques in patients with acute myocardial infarction*. N Engl J Med, 2000. **343**(13): p. 915-22.
- 316 4. Mehta, S.R., et al., *Complete Revascularization with Multivessel PCI for Myocardial Infarction*. N Engl J Med, 2019. **381**(15): p. 1411-1421.
- 317 5. Baine, K.R., et al., *Complete vs Culprit-Lesion-Only Revascularization for ST-Segment Elevation Myocardial Infarction: A Systematic Review and Meta-analysis*. JAMA Cardiol, 2020.
- 318 6. Rathod, K.S., et al., *Complete Versus Culprit-Only Lesion Intervention in Patients With Acute Coronary Syndromes*. J Am Coll Cardiol, 2018. **72**(17): p. 1989-1999.
- 319 7. Thim, T., et al., *Evaluation and Management of Nonculprit Lesions in STEMI*. JACC Cardiovasc Interv, 2020. **13**(10): p. 1145-1154.
- 320 8. Tonino, P.A., et al., *Fractional flow reserve versus angiography for guiding percutaneous coronary intervention*. N Engl J Med, 2009. **360**(3): p. 213-24.
- 321 9. van Nunen, L.X., et al., *Fractional flow reserve versus angiography for guidance of PCI in patients with multivessel coronary artery disease (FAME): 5-year follow-up of a randomised controlled trial*. Lancet, 2015. **386**(10006): p. 1853-60.
- 322 10. Masrani Mehta, S., et al., *Association of Lower Fractional Flow Reserve Values With Higher Risk of Adverse Cardiac Events for Lesions Deferred Revascularization Among Patients With Acute Coronary Syndrome*. J Am Heart Assoc, 2015. **4**(8): p. e002172.
- 323 11. Hakeem, A., et al., *Long-Term Prognosis of Deferred Acute Coronary Syndrome Lesions Based on Nonischemic Fractional Flow Reserve*. J Am Coll Cardiol, 2016. **68**(11): p. 1181-1191.
- 324 12. Virmani, R., et al., *Lessons from sudden coronary death: a comprehensive morphological classification scheme for atherosclerotic lesions*. Arterioscler Thromb Vasc Biol, 2000. **20**(5): p. 1262-75.
- 325 13. Bentzon, J.F., et al., *Mechanisms of plaque formation and rupture*. Circ Res, 2014. **114**(12): p. 1852-66.
- 326 14. Jang, I.K., et al., *In vivo characterization of coronary atherosclerotic plaque by use of optical coherence tomography*. Circulation, 2005. **111**(12): p. 1551-5.
- 327 15. Kato, K., et al., *Nonculprit plaques in patients with acute coronary syndromes have more vulnerable features compared with those with non-acute coronary syndromes: a 3-vessel optical coherence tomography study*. Circ Cardiovasc Imaging, 2012. **5**(4): p. 433-40.
- 328 16. Maejima, N., et al., *Morphological features of non-culprit plaques on optical coherence tomography and integrated backscatter intravascular ultrasound in patients with acute coronary syndromes*. Eur Heart J Cardiovasc Imaging, 2015. **16**(2): p. 190-7.
- 329 17. Iannaccone, M., et al., *Prevalence and predictors of culprit plaque rupture at OCT in patients with coronary artery disease: a meta-analysis*. Eur Heart J Cardiovasc Imaging, 2016. **17**(10): p. 1128-37.
- 330 18. Bom, M.J., et al., *Early Detection and Treatment of the Vulnerable Coronary Plaque: Can We Prevent Acute Coronary Syndromes?* Circ Cardiovasc Imaging, 2017. **10**(5).
- 331 19. Stone, G.W., et al., *A prospective natural-history study of coronary atherosclerosis*. N Engl J Med, 2011. **364**(3): p. 226-35.
- 332 20. Waksman, R., et al., *Identification of patients and plaques vulnerable to future coronary events with near-infrared spectroscopy intravascular ultrasound imaging: a prospective, cohort study*. Lancet, 2019. **394**(10209): p. 1629-1637.
- 333 21. Kini, A.S., et al., *Fibrous Cap Thickness by Optical Coherence Tomography In Vivo*. J Am Coll Cardiol, 2017. **69**(6): p. 644-657.

- 1  
2  
3 362 22. Prati, F., et al., *Expert review document on methodology, terminology, and clinical*  
4 363 *applications of optical coherence tomography: physical principles, methodology of image*  
5 364 *acquisition, and clinical application for assessment of coronary arteries and atherosclerosis.*  
6 365 *Eur Heart J*, 2010. **31**(4): p. 401-15.  
7  
8 366 23. Tearney, G.J., et al., *Consensus standards for acquisition, measurement, and reporting of*  
9 367 *intravascular optical coherence tomography studies: a report from the International Working*  
10 368 *Group for Intravascular Optical Coherence Tomography Standardization and Validation.* *J Am*  
11 369 *Coll Cardiol*, 2012. **59**(12): p. 1058-72.  
12 370 24. Sels, J.W., et al., *Fractional flow reserve in unstable angina and non-ST-segment elevation*  
13 371 *myocardial infarction experience from the FAME (Fractional flow reserve versus Angiography*  
14 372 *for Multivessel Evaluation) study.* *JACC Cardiovasc Interv*, 2011. **4**(11): p. 1183-9.  
15 373 25. Engström, T., et al., *Complete revascularisation versus treatment of the culprit lesion only in*  
16 374 *patients with ST-segment elevation myocardial infarction and multivessel disease (DANAMI-*  
17 375 *3—PRIMULTI): an open-label, randomised controlled trial.* *Lancet*, 2015. **386**(9994): p. 665-  
18 376 71.  
19 377 26. Smits, P.C., et al., *Fractional Flow Reserve-Guided Multivessel Angioplasty in Myocardial*  
20 378 *Infarction.* *N Engl J Med*, 2017. **376**(13): p. 1234-1244.  
21 379 27. Wald, D.S., et al., *Randomized trial of preventive angioplasty in myocardial infarction.* *N Engl J*  
22 380 *Med*, 2013. **369**(12): p. 1115-23.  
23 381 28. Layland, J., et al., *Fractional flow reserve vs. angiography in guiding management to optimize*  
24 382 *outcomes in non-ST-segment elevation myocardial infarction: the British Heart Foundation*  
25 383 *FAMOUS-NSTEMI randomized trial.* *Eur Heart J*, 2015. **36**(2): p. 100-11.  
26 384 29. Calvert, P.A., et al., *Association between IVUS findings and adverse outcomes in patients with*  
27 385 *coronary artery disease: the VIVA (VH-IVUS in Vulnerable Atherosclerosis) Study.* *JACC*  
28 386 *Cardiovasc Imaging*, 2011. **4**(8): p. 894-901.  
29 387 30. Cheng, J.M., et al., *In vivo detection of high-risk coronary plaques by radiofrequency*  
30 388 *intravascular ultrasound and cardiovascular outcome: results of the ATHEROREMO-IVUS*  
31 389 *study.* *Eur Heart J*, 2014. **35**(10): p. 639-47.  
32 390 31. Burke, A.P., et al., *Coronary risk factors and plaque morphology in men with coronary disease*  
33 391 *who died suddenly.* *N Engl J Med*, 1997. **336**(18): p. 1276-82.  
34 392 32. Narula, J., et al., *Histopathologic characteristics of atherosclerotic coronary disease and*  
35 393 *implications of the findings for the invasive and noninvasive detection of vulnerable plaques.* *J*  
36 394 *Am Coll Cardiol*, 2013. **61**(10): p. 1041-51.  
37 395 33. Schuurman, A.S., et al., *Near-infrared spectroscopy-derived lipid core burden index predicts*  
38 396 *adverse cardiovascular outcome in patients with coronary artery disease during long-term*  
39 397 *follow-up.* *Eur Heart J*, 2018. **39**(4): p. 295-302.  
40 398 34. Prati, F., et al., *Relationship between coronary plaque morphology of the left anterior*  
41 399 *descending artery and 12 months clinical outcome: the CLIMA study.* *Eur Heart J*, 2020. **41**(3):  
42 400 p. 383-391.  
43 401 35. Kennedy, M.W., et al., *Combined optical coherence tomography morphologic and fractional*  
44 402 *flow reserve hemodynamic assessment of non-culprit lesions to better predict adverse event*  
45 403 *outcomes in diabetes mellitus patients: COMBINE (OCT-FFR) prospective study. Rationale and*  
46 404 *design.* *Cardiovasc Diabetol*, 2016. **15**(1): p. 144.  
47 405 36. Kedhi, E., et al., *Combined Optical Coherence Tomography and Fractional Flow Reserve*  
48 406 *Assessment to Better Predict Adverse Event Outcomes in DM patients: Combine (OCT-FFR)*  
49 407 *Trial.* *Transcatheter Cardiovascular Therapeutics Annual Conference*, 14 Oktober, 2020.  
50 408 37. Mol, J.Q., et al., *Pre-Emptive OCT-Guided Angioplasty of Vulnerable Intermediate Coronary*  
51 409 *Lesions: Results from the Prematurely Halted PECTUS-Trial.* *J Interv Cardiol*, 2020. **2020**: p.  
52 410 8821525.  
53 411 38. Stone, G.W., et al., *Percutaneous Coronary Intervention for Vulnerable Coronary*  
54 412 *Atherosclerotic Plaque.* *J Am Coll Cardiol*, 2020. **76**(20): p. 2289-2301.  
55  
56  
57  
58  
59  
60

1  
2  
3 414 **Figure 1.** PECTUS-obs flowchart  
4

5 415  
6 **Figure 1.** PECTUS-obs flowchart  
7

8 416 CAG, coronary angiography, FFR, fractional flow reserve, NSTEMI, Non- ST-elevation myocardial infarction,  
9 417 OCT, optical coherence tomography, STEMI, ST-elevation myocardial infarction

11  
12 418

13  
14 419 **Figure 2.** Lesion assessment in the PECTUS-obs study  
15

16  
17 **Figure 2.** Lesion assessment in the PECTUS-obs study  
18

19 **Upper left:** CAG shows a non-culprit lesion (red box) in the proximal RCA. The radiopaque marker  
20 inside the vessel at the location of the lesion represents the OCT lens.  
21

22 **Lower left:** FFR- measurement of the lesion reveals that it is non flow-limiting (FFR = 0.94).  
23

24 **Right:** OCT-imaging shows an atherosclerotic plaque with a lipid arc of 200° and a minimal fibrous  
25 cap thickness of 4 µm. This lesion therefore meets the criteria for a vulnerable plaque.  
26

27  
28 CAG, coronary angiography, FFR, fractional flow reserve, OCT, optical coherence tomography, RCA, right coronary  
29 artery  
30

31 420  
32  
33  
34  
35  
36  
37  
38  
39  
40  
41  
42  
43  
44  
45  
46  
47  
48  
49  
50  
51  
52  
53  
54  
55  
56  
57  
58  
59  
60

1  
2  
3  
4  
5  
6  
7  
8  
9  
10  
11  
12  
13  
14  
15  
16  
17  
18  
19  
20  
21  
22  
23  
24  
25  
26  
27  
28  
29  
30  
31  
32  
33  
34  
35  
36  
37  
38  
39  
40  
41  
42  
43  
44  
45  
46  
47  
48  
49  
50  
51  
52  
53  
54  
55  
56  
57  
58  
59  
60

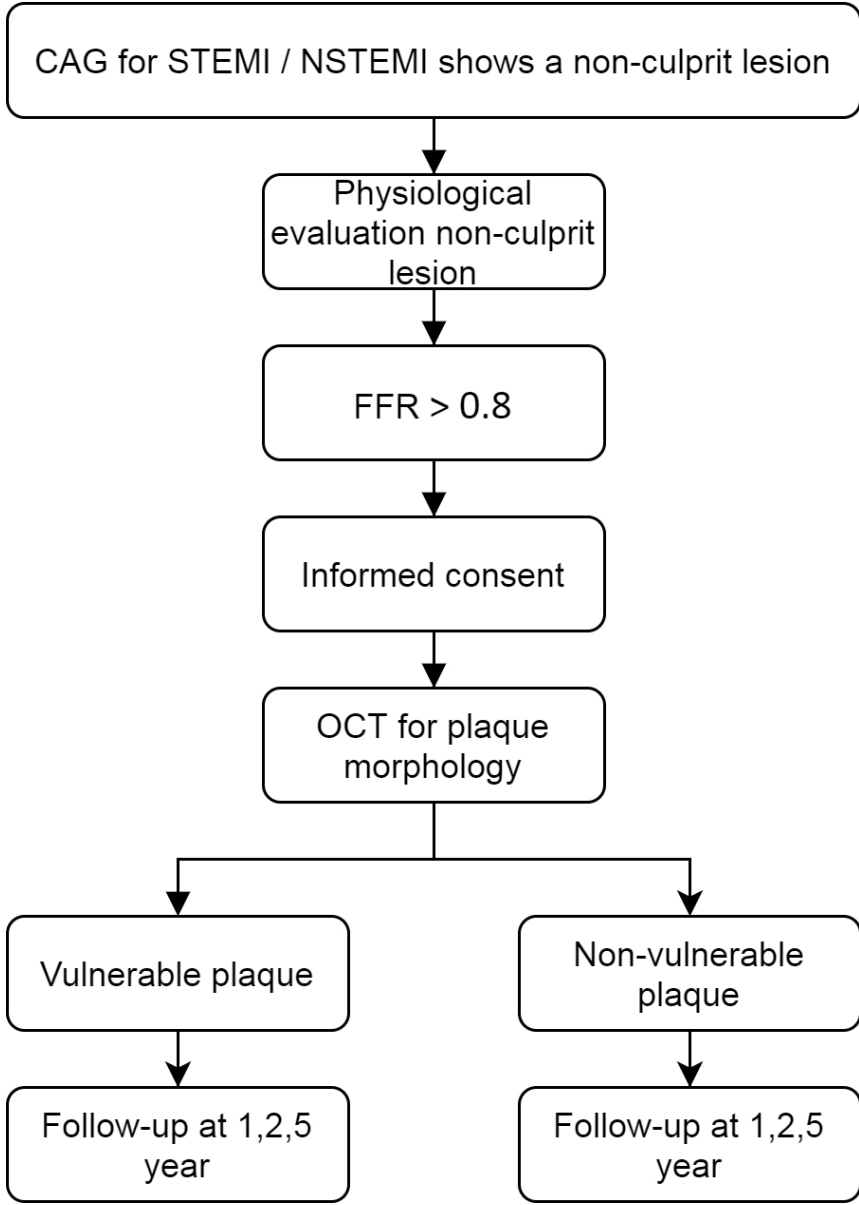

Figure 1. PECTUS-obs flowchart  
CAG, coronary angiography, FFR, fractional flow reserve, NSTEMI, Non- ST-elevation myocardial infarction, OCT, optical coherence tomography, STEMI, ST-elevation myocardial infarction



Figure 2. Lesion assessment in the PECTUS-obs study. Upper left: CAG shows a non-culprit lesion (red box) in the proximal RCA. The radiopaque marker inside the vessel at the location of the lesion represents the OCT lens. Lower left: FFR- measurement of the lesion reveals that it is non flow-limiting (FFR = 0.94). Right: OCT-imaging shows an atherosclerotic plaque with a lipid arc of 200° and a minimal fibrous cap thickness of 4  $\mu$ m. This lesion therefore meets the criteria for a vulnerable plaque. CAG, coronary angiography, FFR, fractional flow reserve, OCT, optical coherence tomography, RCA, right coronary artery

274x167mm (120 x 120 DPI)
